# Supplementary material for: Predicting Pinus monophylla forest cover in the Baja California Desert by remote sensing
Source: PeerJ. 2018 Apr 4;6:e4603. doi: 10.7717/peerj.4603 (PMC5889705; doi:10.7717/peerj.4603)
Supplement: Supplemental Information 1 [file peerj-06-4603-s001.xlsx]

## Sheet: currentClim_derived
PointID	long	lat	elev	mat	map	gsp	mtcm	mmin	mtwm	mmax	sday	fday	ffp	dd5	gsdd5	d100	dd0	mmindd0	smrpb	smrsprpb	sprp	smrp	winp
1	-114.102	29.3687	1332	16.5	233	81	10.7	3.3	24.5	34.1	86	328	253	4221	3426	17	0	86	8	5.62	8	45	112
2	-114.102	29.3688	1389	16.3	242	84	10.6	3.1	24.4	33.9	86	330	256	4159	3400	18	0	98	8.33	5.88	8	47	117
3	-114.102	29.3688	1398	16.3	243	85	10.5	3.1	24.3	33.9	86	330	256	4141	3389	18	0	98	8.44	6	8	48	117
4	-114.102	29.369	1397	16.3	243	85	10.5	3.1	24.3	33.9	86	330	256	4144	3391	18	0	98	8.44	6	8	48	117
5	-114.102	29.3691	1318	16.6	230	79	10.8	3.4	24.6	34.2	86	330	254	4236	3452	17	0	83	7.78	5.38	8	43	111
6	-114.102	29.3691	1305	16.6	228	77	10.8	3.4	24.6	34.2	87	330	254	4251	3457	17	0	82	8.62	6.14	7	43	111
7	-114.102	29.3692	1346	16.4	235	81	10.7	3.3	24.5	34.1	86	328	253	4200	3411	17	0	87	8	5.62	8	45	114
8	-114.103	29.3692	1409	16.2	246	87	10.5	3.1	24.3	33.9	86	332	260	4129	3396	18	0	101	8.67	6.12	8	49	118
9	-114.103	29.3693	1277	16.7	223	75	10.9	3.5	24.7	34.3	88	331	255	4281	3479	17	0	77	8.38	5.86	7	41	109
10	-114.102	29.3694	1443	16.1	252	89	10.4	2.9	24.2	33.8	84	331	264	4090	3377	18	0	108	8.89	6.38	8	51	120
11	-114.103	29.3694	1282	16.7	225	77	10.9	3.5	24.7	34.2	87	331	255	4278	3484	17	0	78	8.62	6.14	7	43	109
12	-114.103	29.3695	1435	16.2	250	88	10.4	3	24.2	33.8	86	331	260	4099	3367	18	0	104	8.78	6.25	8	50	119
13	-114.103	29.3696	1304	16.6	227	77	10.8	3.4	24.6	34.2	87	330	254	4254	3457	17	0	81	8.62	6.14	7	43	111
14	-114.103	29.3696	1262	16.7	222	75	10.9	3.5	24.7	34.3	87	331	255	4295	3493	17	0	75	8.38	5.86	7	41	108
15	-114.103	29.3697	1294	16.6	227	77	10.8	3.4	24.6	34.2	87	330	255	4263	3463	17	0	81	8.62	6.14	7	43	111
16	-114.103	29.3697	1380	16.4	241	84	10.6	3.1	24.4	34	85	329	254	4164	3403	18	0	97	8.33	5.88	8	47	116
17	-114.103	29.3698	1370	16.4	240	84	10.6	3.2	24.4	34	86	329	254	4170	3398	18	0	93	8.33	5.88	8	47	115
18	-114.103	29.3698	1276	16.7	223	75	10.9	3.5	24.7	34.3	88	331	255	4281	3479	17	0	77	8.38	5.86	7	41	109
19	-114.103	29.3698	1279	16.7	223	75	10.9	3.5	24.7	34.3	88	331	255	4278	3476	17	0	77	8.38	5.86	7	41	109
20	-114.103	29.3699	1427	16.2	247	87	10.5	3	24.2	33.8	86	332	261	4105	3378	18	0	104	8.67	6.12	8	49	119
21	-114.103	29.3699	1407	16.2	245	86	10.5	3.1	24.3	33.9	86	331	258	4129	3388	18	0	99	8.56	6.12	8	49	118
22	-114.103	29.3699	1251	16.8	221	74	11	3.6	24.7	34.3	85	331	256	4307	3517	17	0	73	8.25	5.86	7	41	108
23	-114.103	29.3698	1405	16.2	245	86	10.5	3.1	24.3	33.9	86	330	258	4129	3380	18	0	99	8.56	6.12	8	49	118
24	-114.103	29.3698	1458	16.1	255	90	10.4	2.9	24.1	33.7	83	331	265	4069	3366	18	0	109	9	6.38	8	51	122
25	-114.103	29.3697	1412	16.2	247	87	10.5	3	24.3	33.9	86	332	261	4126	3396	18	0	102	8.67	6.12	8	49	119
26	-114.103	29.3697	1392	16.3	242	84	10.6	3.1	24.3	33.9	86	330	256	4152	3394	18	0	98	8.33	5.88	8	47	117
27	-114.103	29.3697	1377	16.4	241	84	10.6	3.2	24.4	34	86	329	254	4164	3396	18	0	94	8.33	5.88	8	47	116
28	-114.103	29.3697	1381	16.4	241	84	10.6	3.1	24.4	34	85	329	254	4164	3403	18	0	97	8.33	5.88	8	47	116
29	-114.103	29.3696	1282	16.7	223	75	10.9	3.5	24.7	34.3	87	331	255	4275	3481	17	0	78	8.38	5.86	7	41	109
30	-114.103	29.3696	1327	16.5	233	81	10.8	3.3	24.5	34.1	86	329	253	4230	3438	17	0	86	8	5.62	8	45	112
31	-114.103	29.3695	1424	16.2	247	87	10.5	3	24.2	33.8	86	332	261	4117	3386	18	0	103	8.67	6.12	8	49	119
32	-114.103	29.3695	1375	16.4	240	84	10.6	3.2	24.4	34	86	329	254	4164	3396	18	0	94	8.33	5.88	8	47	115
33	-114.103	29.3694	1180	17	210	69	11.2	3.8	24.9	34.5	75	332	261	4385	3656	16	0	65	7.62	5.29	7	37	104
34	-114.103	29.3694	1360	16.4	237	83	10.7	3.2	24.4	34	86	329	254	4191	3413	17	0	93	8.22	5.75	8	46	114
35	-114.103	29.3693	1368	16.4	240	84	10.6	3.2	24.4	34	86	329	254	4173	3402	18	0	93	8.33	5.88	8	47	115
36	-114.103	29.3692	1438	16.1	251	88	10.4	3	24.2	33.8	85	331	263	4093	3373	18	0	106	8.78	6.25	8	50	120
37	-114.103	29.3691	1308	16.6	228	77	10.8	3.4	24.6	34.2	87	330	254	4245	3454	17	0	83	8.62	6.14	7	43	111
38	-114.103	29.3691	1418	16.2	247	87	10.5	3	24.3	33.9	86	332	261	4120	3390	18	0	103	8.67	6.12	8	49	119
39	-114.103	29.369	1221	16.9	213	72	11.1	3.7	24.8	34.4	81	332	257	4343	3580	16	0	69	8	5.57	7	39	104
40	-114.103	29.369	1424	16.2	247	87	10.5	3	24.2	33.8	86	332	261	4117	3386	18	0	103	8.67	6.12	8	49	119
41	-114.103	29.369	1409	16.2	246	87	10.5	3.1	24.3	33.9	86	332	260	4129	3396	18	0	101	8.67	6.12	8	49	118
42	-114.103	29.369	1405	16.3	245	86	10.5	3.1	24.3	33.9	86	330	258	4132	3380	18	0	99	8.56	6.12	8	49	118
43	-114.103	29.3691	1456	16.1	255	90	10.4	2.9	24.1	33.7	83	331	265	4069	3366	18	0	109	9	6.38	8	51	122
44	-114.103	29.3691	1332	16.5	233	81	10.7	3.3	24.5	34.1	86	329	253	4218	3431	17	0	86	8	5.62	8	45	112
45	-114.103	29.3692	1296	16.6	227	77	10.8	3.4	24.6	34.2	87	330	255	4260	3460	17	0	81	8.62	6.14	7	43	111
46	-114.103	29.3693	1479	16	258	93	10.3	2.8	24.1	33.6	82	331	261	4042	3354	19	0	114	8.3	6.62	8	53	122
47	-114.103	29.3694	1458	16.1	255	90	10.4	2.9	24.1	33.7	83	331	265	4069	3366	18	0	109	9	6.38	8	51	122
48	-114.103	29.3695	1434	16.2	250	88	10.4	3	24.2	33.8	86	331	260	4099	3367	18	0	104	8.78	6.25	8	50	119
49	-114.103	29.3696	1402	16.3	245	86	10.5	3.1	24.3	33.9	86	330	258	4132	3380	18	0	99	8.56	6.12	8	49	118
50	-114.103	29.3697	1488	16	259	94	10.3	2.8	24	33.6	82	331	261	4034	3348	19	0	114	7.55	5.89	9	53	122
51	-114.103	29.3698	1432	16.2	250	88	10.4	3	24.2	33.8	86	332	261	4099	3375	18	0	104	8.78	6.25	8	50	119
52	-114.103	29.3693	1377	16.4	241	84	10.6	3.2	24.4	34	86	329	254	4164	3396	18	0	94	8.33	5.88	8	47	116
53	-114.103	29.3692	1396	16.3	244	86	10.6	3.1	24.3	33.9	86	330	256	4149	3391	18	0	98	8.56	6.12	8	49	117
54	-114.103	29.3689	1391	16.3	242	84	10.6	3.1	24.3	33.9	86	330	256	4155	3397	18	0	98	8.33	5.88	8	47	117
55	-114.103	29.3688	1396	16.3	243	85	10.6	3.1	24.3	33.9	86	330	256	4146	3391	18	0	98	8.44	6	8	48	117
56	-114.102	29.3687	1386	16.3	241	84	10.6	3.1	24.4	33.9	86	329	254	4162	3395	18	0	97	8.33	5.88	8	47	116
57	-114.102	29.3686	1385	16.3	241	84	10.6	3.1	24.4	33.9	86	329	254	4162	3395	18	0	97	8.33	5.88	8	47	116
58	-114.103	29.3687	1459	16.1	255	90	10.4	2.9	24.1	33.7	83	331	265	4069	3366	18	0	109	9	6.38	8	51	122
59	-114.103	29.3687	1486	16	259	94	10.3	2.8	24	33.6	82	331	261	4034	3348	19	0	114	7.55	5.89	9	53	122
60	-114.103	29.3687	1394	16.3	243	85	10.6	3.1	24.3	33.9	86	330	256	4149	3391	18	0	98	8.44	6	8	48	117
61	-114.103	29.3687	1393	16.3	243	85	10.6	3.1	24.3	33.9	86	330	256	4149	3391	18	0	98	8.44	6	8	48	117
62	-114.103	29.3688	1428	16.2	247	87	10.5	3	24.2	33.8	86	332	261	4105	3378	18	0	104	8.67	6.12	8	49	119
63	-114.103	29.3688	1388	16.3	241	84	10.6	3.1	24.4	33.9	86	330	256	4159	3400	18	0	97	8.33	5.88	8	47	116
64	-114.103	29.3689	1410	16.2	246	87	10.5	3.1	24.3	33.9	86	332	260	4129	3396	18	0	101	8.67	6.12	8	49	118
65	-114.103	29.369	1498	16	263	96	10.2	2.8	24	33.6	86	327	249	4025	3286	19	0	118	7.73	6	9	54	123
66	-114.103	29.369	1488	16	259	94	10.3	2.8	24	33.6	82	331	261	4034	3348	19	0	114	7.55	5.89	9	53	122
67	-114.103	29.3691	1492	16	261	95	10.3	2.8	24	33.6	84	331	260	4031	3334	19	0	115	7.64	5.89	9	53	123
68	-114.103	29.3692	1522	15.9	267	97	10.2	2.7	23.9	33.5	95	327	248	3995	3198	19	0	122	7.82	6.11	9	55	126
69	-114.103	29.3694	1487	16	259	94	10.3	2.8	24	33.6	82	331	261	4034	3348	19	0	114	7.55	5.89	9	53	122
70	-114.104	29.3695	1449	16.1	253	90	10.4	2.9	24.2	33.7	83	331	265	4084	3377	18	0	108	9	6.38	8	51	120
71	-114.104	29.3695	1497	16	263	96	10.2	2.8	24	33.6	86	327	249	4025	3286	19	0	118	7.73	6	9	54	123
72	-114.104	29.3696	1463	16.1	255	91	10.3	2.9	24.1	33.7	83	331	265	4066	3366	19	0	109	9.11	6.5	8	52	121
73	-114.104	29.3697	1523	15.9	267	97	10.2	2.7	23.9	33.5	95	327	248	3995	3198	19	0	122	7.82	6.11	9	55	126
74	-114.104	29.3697	1490	16	259	94	10.3	2.8	24	33.6	82	331	261	4034	3348	19	0	114	7.55	5.89	9	53	122
75	-114.104	29.3698	1459	16.1	254	90	10.4	2.9	24.1	33.7	83	331	265	4069	3366	18	0	109	9	6.38	8	51	121
76	-114.104	29.3698	1441	16.1	251	89	10.4	2.9	24.2	33.8	84	331	264	4093	3380	18	0	107	8.89	6.38	8	51	119
77	-114.104	29.3699	1437	16.2	251	89	10.4	3	24.2	33.8	85	332	263	4099	3382	18	0	105	8.89	6.38	8	51	119
78	-114.104	29.3699	1497	16	263	96	10.2	2.8	24	33.6	86	327	249	4025	3286	19	0	118	7.73	6	9	54	123
79	-114.104	29.3699	1408	16.3	246	87	10.5	3.1	24.3	33.9	86	332	260	4132	3399	18	0	100	8.67	6.12	8	49	118
80	-114.104	29.3698	1429	16.2	250	89	10.5	3	24.2	33.8	86	332	261	4105	3378	18	0	104	8.89	6.38	8	51	119
81	-114.104	29.3698	1459	16.1	255	91	10.4	2.9	24.1	33.7	83	331	265	4069	3366	18	0	109	9.11	6.5	8	52	121
82	-114.103	29.3695	1491	16	260	95	10.3	2.8	24	33.6	82	331	261	4034	3348	19	0	114	7.64	5.89	9	53	122
83	-114.103	29.3694	1480	16	258	93	10.3	2.8	24.1	33.6	82	331	261	4051	3363	19	0	114	8.3	6.62	8	53	122
84	-114.103	29.3693	1425	16.2	249	88	10.5	3	24.3	33.8	86	332	261	4117	3386	18	0	103	8.78	6.25	8	50	119
85	-114.103	29.3692	1515	15.9	267	97	10.2	2.7	24	33.5	94	327	250	4004	3213	19	0	120	7.82	6.11	9	55	126
86	-114.103	29.3689	1513	15.9	267	97	10.2	2.7	24	33.5	94	327	250	4004	3213	19	0	120	7.82	6.11	9	55	126
87	-114.103	29.3688	1488	16	259	94	10.3	2.8	24	33.6	82	331	261	4034	3348	19	0	114	7.55	5.89	9	53	122
88	-114.103	29.3687	1522	15.9	267	97	10.2	2.7	23.9	33.5	95	327	248	3995	3198	19	0	122	7.82	6.11	9	55	126
89	-114.103	29.3686	1509	15.9	266	97	10.2	2.7	24	33.5	94	327	250	4013	3218	19	0	120	7.82	6.11	9	55	125
90	-114.103	29.3686	1617	15.5	286	106	9.9	2.4	23.6	33.1	105	324	240	3872	3011	20	0	143	7.83	6.1	10	61	133
91	-114.103	29.3687	1493	16	261	96	10.3	2.8	24	33.6	84	327	250	4031	3302	19	0	115	7.73	6	9	54	122
92	-114.103	29.3688	1548	15.8	271	100	10.1	2.6	23.8	33.4	101	326	247	3962	3120	19	0	127	8.09	6.33	9	57	127
93	-114.103	29.3688	1556	15.8	273	100	10.1	2.6	23.8	33.4	101	325	241	3953	3103	19	0	130	8.09	6.33	9	57	128
94	-114.103	29.3688	1525	15.9	268	98	10.2	2.7	23.9	33.5	95	327	248	3995	3198	19	0	124	7.91	6.22	9	56	126
95	-114.103	29.3689	1631	15.5	288	108	9.8	2.3	23.5	33.1	106	324	241	3852	2995	20	0	145	8	6.2	10	62	133
96	-114.104	29.3689	1492	16	261	96	10.3	2.8	24	33.6	82	331	261	4031	3347	19	0	114	7.73	6	9	54	122
97	-114.104	29.3689	1501	16	264	97	10.2	2.7	24	33.6	86	327	250	4022	3286	19	0	119	7.82	6.11	9	55	123
98	-114.104	29.369	1522	15.9	267	97	10.2	2.7	23.9	33.5	95	327	248	3995	3198	19	0	122	7.82	6.11	9	55	126
99	-114.104	29.369	1505	15.9	265	97	10.2	2.7	24	33.6	94	327	250	4015	3221	19	0	120	7.82	6.11	9	55	124
100	-114.104	29.3691	1507	15.9	265	97	10.2	2.7	24	33.6	94	327	250	4015	3221	19	0	120	7.82	6.11	9	55	124
101	-114.104	29.3691	1308	16.6	230	79	10.8	3.4	24.6	34.2	86	330	254	4248	3461	17	0	83	7.78	5.38	8	43	111
102	-114.104	29.3692	1258	16.7	221	74	11	3.6	24.7	34.3	87	331	256	4295	3490	17	0	74	8.25	5.86	7	41	108
103	-114.104	29.3692	1365	16.4	239	84	10.7	3.2	24.4	34	86	329	254	4179	3401	17	0	93	8.33	5.88	8	47	114
104	-114.104	29.3693	1230	16.8	216	72	11	3.6	24.8	34.4	82	332	257	4328	3561	17	0	71	8	5.57	7	39	107
105	-114.104	29.3693	1364	16.4	238	84	10.7	3.2	24.4	34	86	329	254	4182	3404	17	0	93	8.33	5.88	8	47	114
106	-114.104	29.3694	1256	16.7	221	74	11	3.6	24.7	34.3	87	331	256	4301	3496	17	0	74	8.25	5.86	7	41	108
107	-114.104	29.3694	1337	16.5	233	81	10.7	3.3	24.5	34.1	86	328	253	4212	3416	17	0	87	8	5.62	8	45	112
108	-114.104	29.3695	1239	16.8	219	72	11	3.6	24.7	34.3	85	331	255	4319	3520	17	0	73	8	5.57	7	39	108
109	-114.104	29.3696	1330	16.5	233	81	10.8	3.3	24.5	34.1	86	329	253	4221	3431	17	0	86	8	5.62	8	45	112
110	-114.104	29.3696	1365	16.4	239	84	10.7	3.2	24.4	34	86	329	254	4179	3401	17	0	93	8.33	5.88	8	47	114
111	-114.104	29.3696	1315	16.5	230	79	10.8	3.4	24.5	34.1	86	330	254	4233	3449	17	0	83	7.78	5.38	8	43	111
112	-114.104	29.3695	1339	16.5	234	81	10.7	3.3	24.5	34.1	86	328	253	4209	3416	17	0	89	8	5.62	8	45	113
113	-114.104	29.3695	1216	16.9	213	72	11.1	3.7	24.8	34.4	81	332	257	4349	3583	16	0	69	8	5.57	7	39	104
114	-114.104	29.3694	1159	17	206	69	11.2	3.9	24.9	34.5	73	334	269	4399	3698	16	0	61	7.62	5.29	7	37	101
115	-114.104	29.3694	1330	16.5	233	81	10.8	3.3	24.5	34.1	86	329	253	4221	3431	17	0	86	8	5.62	8	45	112
116	-114.104	29.3693	1222	16.8	213	72	11.1	3.7	24.8	34.4	81	332	257	4337	3574	16	0	69	8	5.57	7	39	104
117	-114.104	29.3693	1294	16.6	227	77	10.9	3.4	24.6	34.2	87	331	255	4259	3466	17	0	80	8.62	6.14	7	43	111
118	-114.104	29.3692	1187	16.9	210	69	11.2	3.8	24.9	34.4	76	332	261	4373	3637	16	0	65	7.62	5.29	7	37	104
119	-114.104	29.3691	1293	16.6	227	77	10.9	3.4	24.6	34.2	87	331	255	4259	3466	17	0	80	8.62	6.14	7	43	111
120	-114.104	29.369	1375	16.4	241	84	10.6	3.2	24.4	34	87	329	254	4167	3388	18	0	94	8.33	5.88	8	47	116
121	-114.104	29.3689	1375	16.4	241	84	10.6	3.2	24.4	34	87	329	254	4167	3388	18	0	94	8.33	5.88	8	47	116
122	-114.104	29.3692	1375	16.4	241	84	10.6	3.2	24.4	34	87	329	254	4167	3388	18	0	94	8.33	5.88	8	47	116
123	-114.104	29.3693	1379	16.4	241	84	10.6	3.2	24.4	34	87	329	254	4164	3388	18	0	94	8.33	5.88	8	47	116
124	-114.104	29.3694	1371	16.4	240	84	10.6	3.2	24.4	34	86	329	254	4167	3396	18	0	94	8.33	5.88	8	47	115
125	-114.104	29.3695	1379	16.4	241	84	10.6	3.2	24.4	33.9	87	329	254	4164	3388	18	0	94	8.33	5.88	8	47	116
126	-114.104	29.3695	1385	16.3	241	84	10.6	3.1	24.3	33.9	86	329	255	4155	3389	18	0	97	8.33	5.88	8	47	116
127	-114.104	29.3697	1359	16.4	237	83	10.7	3.2	24.4	34	86	329	254	4185	3407	17	0	92	8.22	5.75	8	46	114
128	-114.104	29.3698	1362	16.4	238	84	10.7	3.2	24.4	34	86	329	254	4185	3407	17	0	93	8.33	5.88	8	47	114
129	-114.104	29.3698	1263	16.7	222	75	11	3.5	24.7	34.3	88	331	255	4295	3482	17	0	76	8.38	5.86	7	41	108
130	-114.104	29.3699	1359	16.4	237	83	10.7	3.2	24.4	34	86	329	254	4185	3407	17	0	92	8.22	5.75	8	46	114
131	-114.105	29.3699	1336	16.5	233	81	10.7	3.3	24.5	34.1	86	328	253	4215	3420	17	0	87	8	5.62	8	45	112
132	-114.104	29.3698	1325	16.5	233	81	10.8	3.3	24.5	34.1	86	329	253	4224	3432	17	0	86	8	5.62	8	45	112
133	-114.104	29.3697	1356	16.4	236	82	10.7	3.2	24.4	34	86	329	254	4191	3411	17	0	92	8.11	5.62	8	45	114
134	-114.104	29.3696	1352	16.4	235	81	10.7	3.3	24.4	34	87	328	253	4194	3398	17	0	89	8	5.62	8	45	114
135	-114.104	29.3696	1312	16.6	230	79	10.8	3.4	24.6	34.1	86	330	254	4242	3455	17	0	83	7.78	5.38	8	43	111
136	-114.104	29.3696	1279	16.7	223	75	10.9	3.5	24.6	34.2	87	331	255	4277	3480	17	0	77	8.38	5.86	7	41	109
137	-114.104	29.3697	1363	16.4	238	84	10.7	3.2	24.4	34	86	329	254	4185	3407	17	0	93	8.33	5.88	8	47	114
138	-114.104	29.3699	1337	16.5	233	81	10.7	3.3	24.5	34.1	86	328	253	4212	3416	17	0	87	8	5.62	8	45	112
139	-114.104	29.37	1336	16.5	233	81	10.7	3.3	24.5	34.1	86	328	253	4215	3420	17	0	87	8	5.62	8	45	112
140	-114.105	29.37	1260	16.7	222	75	11	3.6	24.7	34.3	87	331	256	4295	3490	17	0	74	8.38	5.86	7	41	108
141	-114.104	29.37	1369	16.4	240	84	10.6	3.2	24.4	34	86	329	254	4170	3398	18	0	93	8.33	5.88	8	47	115
142	-114.104	29.37	1269	16.7	222	75	10.9	3.5	24.7	34.3	88	331	255	4289	3479	17	0	77	8.38	5.86	7	41	108
143	-114.104	29.37	1382	16.4	241	84	10.6	3.2	24.4	33.9	86	330	255	4164	3404	18	0	95	8.33	5.88	8	47	116
144	-114.104	29.3699	1179	17	210	69	11.2	3.8	24.9	34.5	75	332	261	4390	3656	16	0	65	7.62	5.29	7	37	104
145	-114.104	29.3699	1232	16.8	217	72	11	3.6	24.8	34.3	82	332	257	4325	3558	17	0	71	8	5.57	7	39	108
146	-114.104	29.3699	1147	17.1	203	66	11.3	3.9	25	34.5	71	335	273	4417	3729	16	0	59	7.25	5	7	35	101
147	-114.104	29.3698	1129	17.1	202	66	11.3	4	25	34.5	69	335	274	4429	3756	16	0	58	7.25	5	7	35	100
148	-114.104	29.37	1055	17.3	193	61	11.5	4.2	25.1	34.7	62	338	282	4503	3886	15	0	49	6.62	4.43	7	31	97
149	-114.104	29.3701	1114	17.1	202	66	11.4	4	25	34.6	67	335	275	4449	3783	16	0	55	7.25	5	7	35	100
150	-114.104	29.3703	1113	17.1	201	65	11.4	4	25	34.6	67	335	275	4449	3783	16	0	55	7.12	4.86	7	34	100
151	-114.104	29.3705	1132	17.1	203	66	11.3	4	25	34.5	70	335	273	4429	3749	16	0	58	7.25	5	7	35	101
152	-114.104	29.3704	1082	17.2	196	63	11.5	4.1	25.1	34.6	64	337	277	4482	3845	15	0	52	6.88	4.71	7	33	98
153	-114.104	29.3704	1146	17.1	203	66	11.3	3.9	25	34.5	71	335	273	4417	3729	16	0	59	7.25	5	7	35	101
154	-114.104	29.3703	1119	17.1	202	66	11.4	4	25	34.6	68	335	274	4446	3775	16	0	57	7.25	5	7	35	100
155	-114.104	29.3702	1063	17.3	193	61	11.5	4.2	25.1	34.6	64	337	278	4497	3860	15	0	50	6.62	4.43	7	31	97
156	-114.104	29.3702	1141	17.1	203	66	11.3	3.9	25	34.5	70	335	273	4420	3739	16	0	59	7.25	5	7	35	101
157	-114.104	29.3704	1055	17.3	193	61	11.5	4.2	25.1	34.7	62	338	282	4503	3886	15	0	49	6.62	4.43	7	31	97
158	-114.104	29.3703	1148	17.1	203	66	11.3	3.9	25	34.5	71	335	273	4417	3729	16	0	59	7.25	5	7	35	101
159	-114.104	29.3701	1056	17.3	193	61	11.5	4.2	25.1	34.7	62	338	282	4500	3886	15	0	49	6.62	4.43	7	31	97
160	-114.105	29.3701	1084	17.2	196	63	11.5	4.1	25.1	34.6	64	337	277	4479	3845	15	0	52	6.88	4.71	7	33	98
161	-114.105	29.3701	1053	17.3	193	61	11.5	4.2	25.1	34.7	62	338	282	4506	3889	15	0	49	6.62	4.43	7	31	97
162	-114.105	29.3701	1041	17.3	190	60	11.6	4.3	25.1	34.7	63	338	283	4518	3887	15	0	47	6.5	4.43	7	31	95
163	-114.105	29.3701	1077	17.2	195	63	11.5	4.1	25.1	34.6	64	337	277	4482	3845	15	0	52	6.88	4.71	7	33	97
164	-114.105	29.3702	1063	17.3	193	61	11.5	4.2	25.1	34.6	64	337	278	4497	3860	15	0	50	6.62	4.43	7	31	97
165	-114.105	29.3703	1109	17.1	199	64	11.4	4	25	34.6	67	335	275	4449	3783	16	0	55	7	4.71	7	33	99
166	-114.105	29.3704	1051	17.3	192	60	11.5	4.2	25.1	34.7	62	338	283	4506	3889	15	0	48	6.5	4.43	7	31	97
167	-114.105	29.37	1114	17.1	202	66	11.4	4	25	34.6	67	335	275	4449	3783	16	0	55	7.25	5	7	35	100
168	-114.105	29.37	1040	17.3	190	60	11.6	4.3	25.1	34.7	63	338	283	4518	3887	15	0	47	6.5	4.43	7	31	95
169	-114.105	29.3701	1014	17.4	184	57	11.6	4.3	25.2	34.7	61	339	285	4538	3926	15	0	45	7.14	4.83	6	29	93
170	-114.105	29.3699	1020	17.4	185	58	11.6	4.3	25.2	34.7	61	339	285	4532	3923	15	0	45	7.29	5	6	30	93
171	-114.105	29.3699	1010	17.4	184	57	11.7	4.3	25.2	34.7	60	339	285	4550	3944	15	0	45	7.14	4.83	6	29	93
172	-114.105	29.37	1011	17.4	184	57	11.7	4.3	25.2	34.7	60	339	285	4550	3944	15	0	45	7.14	4.83	6	29	93
173	-114.105	29.3701	1055	17.3	193	61	11.5	4.2	25.1	34.6	62	338	282	4503	3886	15	0	49	6.62	4.43	7	31	97
174	-114.105	29.3701	1258	16.7	223	76	11	3.6	24.6	34.2	87	331	255	4298	3486	17	0	74	8.5	6	7	42	108
175	-114.105	29.3698	1275	16.7	225	77	11	3.5	24.6	34.2	87	331	255	4283	3474	17	0	76	8.62	6.14	7	43	109
176	-114.105	29.3698	1257	16.7	222	75	11	3.6	24.6	34.2	87	331	255	4298	3486	17	0	73	8.38	5.86	7	41	108
177	-114.105	29.3699	1287	16.6	227	78	10.9	3.5	24.5	34.1	86	331	255	4259	3466	17	0	79	8.75	6.14	7	43	110
178	-114.105	29.37	1280	16.6	225	77	11	3.5	24.6	34.1	87	331	255	4271	3468	17	0	76	8.62	6.14	7	43	109
179	-114.105	29.3701	1215	16.9	215	72	11.2	3.7	24.7	34.3	77	332	261	4345	3603	16	0	68	8	5.57	7	39	105
180	-114.105	29.3701	1203	16.9	214	72	11.2	3.8	24.8	34.3	78	332	261	4360	3604	16	0	66	8	5.57	7	39	104
181	-114.105	29.3702	1219	16.8	217	74	11.1	3.7	24.7	34.3	77	332	261	4339	3599	16	0	68	8.25	5.86	7	41	105
182	-114.105	29.3703	1205	16.9	214	72	11.2	3.8	24.7	34.3	77	332	261	4348	3603	16	0	66	8	5.57	7	39	104
183	-114.105	29.3702	1152	17	207	69	11.3	4	24.9	34.4	71	335	273	4404	3716	16	0	59	7.62	5.29	7	37	102
184	-114.105	29.3702	1202	16.9	213	72	11.2	3.8	24.8	34.3	78	332	261	4360	3604	16	0	66	8	5.57	7	39	104
185	-114.105	29.3703	1243	16.8	222	75	11.1	3.7	24.6	34.2	84	332	257	4312	3524	16	0	71	8.38	5.86	7	41	108
186	-114.105	29.3704	1177	17	209	70	11.3	3.9	24.8	34.4	73	334	268	4384	3677	16	0	63	7.75	5.43	7	38	102
187	-114.105	29.3704	1264	16.7	224	77	11	3.6	24.6	34.2	87	331	256	4288	3477	17	0	75	8.62	6.14	7	43	108
188	-114.105	29.3703	1251	16.7	222	75	11	3.6	24.6	34.2	84	332	257	4298	3518	17	0	72	8.38	5.86	7	41	108
189	-114.105	29.3704	1251	16.7	222	75	11	3.6	24.6	34.2	84	332	257	4298	3518	17	0	72	8.38	5.86	7	41	108
190	-114.105	29.3705	1236	16.8	222	75	11.1	3.7	24.7	34.2	84	332	257	4319	3530	16	0	71	8.38	5.86	7	41	108
191	-114.105	29.3706	1220	16.8	216	73	11.1	3.7	24.7	34.3	77	332	261	4339	3599	16	0	68	8.12	5.71	7	40	105
192	-114.105	29.3706	1207	16.9	215	72	11.2	3.8	24.7	34.3	77	332	260	4348	3603	16	0	67	8	5.57	7	39	105
193	-114.105	29.3705	1182	17	211	71	11.3	3.9	24.8	34.4	73	334	268	4381	3677	16	0	63	7.88	5.57	7	39	103
194	-114.105	29.3707	1200	16.9	213	72	11.2	3.8	24.8	34.3	76	332	261	4363	3622	16	0	65	8	5.57	7	39	104
195	-114.105	29.3707	1157	17	207	69	11.3	3.9	24.9	34.4	71	335	273	4404	3716	16	0	60	7.62	5.29	7	37	102
196	-114.105	29.3706	1238	16.8	222	75	11.1	3.7	24.7	34.2	84	332	257	4315	3527	16	0	71	8.38	5.86	7	41	108
197	-114.105	29.3706	1239	16.8	222	75	11.1	3.7	24.7	34.2	84	332	257	4315	3527	16	0	71	8.38	5.86	7	41	108
198	-114.104	29.3706	1293	16.6	228	78	10.9	3.5	24.5	34.1	86	331	255	4256	3464	17	0	79	8.75	6.14	7	43	111
199	-114.104	29.3705	1331	16.5	235	82	10.8	3.4	24.4	34	86	330	254	4214	3428	17	0	85	8.11	5.62	8	45	113
200	-114.104	29.3703	1258	16.7	222	75	11	3.6	24.6	34.2	87	331	255	4298	3486	17	0	73	8.38	5.86	7	41	108
201	-114.104	29.3701	1193	16.9	213	72	11.2	3.8	24.8	34.3	73	334	268	4369	3668	16	0	64	8	5.57	7	39	104
202	-114.104	29.3701	1186	16.9	212	72	11.2	3.8	24.8	34.4	73	334	268	4375	3674	16	0	64	8	5.57	7	39	103
203	-114.104	29.37	1182	17	211	71	11.3	3.9	24.8	34.4	73	334	268	4384	3677	16	0	63	7.88	5.57	7	39	103
204	-114.104	29.3699	1152	17	207	69	11.3	4	24.9	34.4	71	335	273	4404	3716	16	0	59	7.62	5.29	7	37	102
205	-114.104	29.3699	1168	17	208	69	11.3	3.9	24.8	34.4	73	334	269	4393	3683	16	0	61	7.62	5.29	7	37	102
206	-114.104	29.3698	1191	16.9	213	72	11.2	3.8	24.8	34.4	73	334	268	4369	3668	16	0	64	8	5.57	7	39	104
207	-114.104	29.3697	1148	17	207	69	11.3	4	24.9	34.4	71	335	273	4410	3719	16	0	59	7.62	5.29	7	37	102
208	-114.104	29.3696	1203	16.9	214	72	11.2	3.8	24.7	34.3	78	332	261	4357	3601	16	0	66	8	5.57	7	39	104
209	-114.103	29.3696	1205	16.9	214	72	11.2	3.8	24.7	34.3	77	332	261	4348	3603	16	0	66	8	5.57	7	39	104
210	-114.103	29.3694	1210	16.9	215	72	11.2	3.8	24.7	34.3	77	332	260	4348	3603	16	0	67	8	5.57	7	39	105
211	-114.103	29.3693	1219	16.8	217	74	11.1	3.7	24.7	34.3	77	332	261	4339	3599	16	0	68	8.25	5.86	7	41	105
212	-114.103	29.3691	1237	16.8	221	75	11.1	3.7	24.7	34.3	84	332	257	4319	3530	16	0	71	8.38	5.86	7	41	107
213	-114.103	29.3689	1193	16.9	213	72	11.2	3.8	24.8	34.3	73	334	268	4369	3668	16	0	64	8	5.57	7	39	104
214	-114.103	29.3688	1138	17.1	205	69	11.4	4	24.9	34.5	70	335	273	4425	3737	16	0	57	7.62	5.29	7	37	100
215	-114.103	29.3687	1169	17	208	69	11.3	3.9	24.8	34.4	73	334	268	4393	3683	16	0	61	7.62	5.29	7	37	102
216	-114.103	29.3686	1165	17	208	69	11.3	3.9	24.8	34.4	71	335	273	4396	3709	16	0	60	7.62	5.29	7	37	102
217	-114.102	29.3686	1213	16.9	215	72	11.2	3.8	24.7	34.3	77	332	260	4348	3603	16	0	67	8	5.57	7	39	105
218	-114.102	29.3685	1251	16.7	222	75	11	3.6	24.6	34.2	84	332	257	4304	3524	17	0	72	8.38	5.86	7	41	108
219	-114.102	29.3685	1280	16.6	225	77	11	3.5	24.6	34.1	87	331	255	4271	3468	17	0	76	8.62	6.14	7	43	109
220	-114.102	29.3686	1268	16.7	224	77	11	3.6	24.6	34.2	87	331	255	4286	3477	17	0	75	8.62	6.14	7	43	108
221	-114.102	29.3687	1240	16.8	222	75	11.1	3.7	24.7	34.2	84	332	257	4315	3527	16	0	71	8.38	5.86	7	41	108
222	-114.102	29.3688	1250	16.8	222	75	11	3.6	24.6	34.2	84	332	257	4306	3524	17	0	72	8.38	5.86	7	41	108
223	-114.102	29.3689	1232	16.8	218	75	11.1	3.7	24.7	34.3	84	332	257	4330	3539	16	0	70	8.38	5.86	7	41	105
224	-114.102	29.3689	1271	16.7	225	77	11	3.6	24.6	34.2	87	331	255	4283	3474	17	0	75	8.62	6.14	7	43	109
225	-114.102	29.369	1259	16.7	224	77	11	3.6	24.6	34.2	87	331	255	4298	3486	17	0	74	8.62	6.14	7	43	108
226	-114.103	29.3691	1281	16.6	226	78	11	3.5	24.6	34.1	87	331	255	4271	3468	17	0	76	8.75	6.14	7	43	109
227	-114.103	29.3692	1240	16.8	222	75	11.1	3.7	24.7	34.2	84	332	257	4315	3527	16	0	71	8.38	5.86	7	41	108
228	-114.103	29.3692	1265	16.7	224	77	11	3.6	24.6	34.2	87	331	256	4286	3477	17	0	75	8.62	6.14	7	43	108
229	-114.103	29.3692	1225	16.8	217	74	11.1	3.7	24.7	34.3	81	332	256	4333	3565	16	0	68	8.25	5.86	7	41	105
230	-114.103	29.3693	1288	16.6	227	78	10.9	3.5	24.5	34.1	86	331	255	4259	3466	17	0	79	8.75	6.14	7	43	110
231	-114.103	29.3693	1226	16.8	217	74	11.1	3.7	24.7	34.3	81	332	256	4330	3562	16	0	69	8.25	5.86	7	41	105
232	-114.104	29.3694	1257	16.7	223	76	11	3.6	24.6	34.2	87	331	255	4298	3486	17	0	73	8.5	6	7	42	108
233	-114.104	29.3694	1262	16.7	224	77	11	3.6	24.6	34.2	87	331	256	4294	3483	17	0	75	8.62	6.14	7	43	108
234	-114.104	29.3695	1250	16.8	222	75	11.1	3.6	24.6	34.2	84	332	257	4309	3524	16	0	72	8.38	5.86	7	41	108
235	-114.103	29.369	1277	16.7	225	77	11	3.5	24.6	34.2	87	331	255	4280	3474	17	0	76	8.62	6.14	7	43	109
236	-114.103	29.3691	1274	16.7	225	77	11	3.5	24.6	34.2	87	331	255	4283	3474	17	0	76	8.62	6.14	7	43	109
237	-114.103	29.3691	1271	16.7	225	77	11	3.6	24.6	34.2	87	331	255	4283	3474	17	0	75	8.62	6.14	7	43	109
238	-114.104	29.3692	1225	16.8	217	74	11.1	3.7	24.7	34.3	81	332	256	4333	3565	16	0	68	8.25	5.86	7	41	105
239	-114.104	29.3693	1231	16.8	217	74	11.1	3.7	24.7	34.3	84	332	257	4330	3539	16	0	70	8.25	5.86	7	41	105
240	-114.104	29.3694	1236	16.8	219	75	11.1	3.7	24.7	34.3	84	332	257	4322	3533	16	0	70	8.38	5.86	7	41	105
241	-114.104	29.3696	1217	16.9	216	73	11.1	3.7	24.7	34.3	77	332	261	4342	3603	16	0	68	8.12	5.71	7	40	105
242	-114.104	29.3696	1224	16.8	217	74	11.1	3.7	24.7	34.3	81	332	256	4333	3565	16	0	68	8.25	5.86	7	41	105
243	-114.104	29.3693	1231	16.8	217	74	11.1	3.7	24.7	34.3	84	332	257	4330	3539	16	0	70	8.25	5.86	7	41	105
244	-114.103	29.3692	1257	16.7	222	75	11	3.6	24.6	34.2	87	331	255	4298	3486	17	0	73	8.38	5.86	7	41	108
245	-114.103	29.369	1262	16.7	224	77	11	3.6	24.6	34.2	87	331	256	4291	3480	17	0	75	8.62	6.14	7	43	108
246	-114.104	29.3691	1278	16.7	225	77	11	3.5	24.6	34.1	87	331	255	4277	3471	17	0	76	8.62	6.14	7	43	109
247	-114.104	29.3692	1288	16.6	227	78	10.9	3.5	24.5	34.1	86	331	255	4259	3466	17	0	79	8.75	6.14	7	43	110
248	-114.104	29.3694	1273	16.7	225	77	11	3.6	24.6	34.2	87	331	255	4283	3474	17	0	75	8.62	6.14	7	43	109
249	-114.104	29.3695	1339	16.5	237	84	10.8	3.3	24.4	34	87	329	253	4206	3406	17	0	88	8.33	5.88	8	47	113
250	-114.104	29.3697	1319	16.5	232	81	10.8	3.4	24.4	34	86	330	254	4223	3433	17	0	85	8	5.62	8	45	111
251	-114.104	29.3698	1325	16.5	232	81	10.8	3.4	24.4	34	86	330	254	4217	3431	17	0	85	8	5.62	8	45	111
252	-114.104	29.3699	1334	16.5	235	82	10.8	3.4	24.4	34	86	330	254	4211	3425	17	0	86	8.11	5.62	8	45	113
253	-114.104	29.37	1334	16.5	235	82	10.8	3.4	24.4	34	86	330	254	4211	3425	17	0	86	8.11	5.62	8	45	113
254	-114.104	29.3701	1284	16.6	226	78	10.9	3.5	24.6	34.1	87	331	255	4268	3468	17	0	78	8.75	6.14	7	43	109
255	-114.104	29.3702	1287	16.6	227	78	10.9	3.5	24.5	34.1	86	331	255	4262	3470	17	0	79	8.75	6.14	7	43	110
256	-114.104	29.3706	1277	16.7	225	77	11	3.5	24.6	34.2	87	331	255	4280	3474	17	0	76	8.62	6.14	7	43	109
257	-114.104	29.3706	1263	16.7	224	77	11	3.6	24.6	34.2	87	331	256	4291	3480	17	0	75	8.62	6.14	7	43	108
258	-114.104	29.3705	1259	16.7	224	77	11	3.6	24.6	34.2	87	331	255	4298	3486	17	0	74	8.62	6.14	7	43	108
259	-114.104	29.3705	1252	16.7	222	75	11	3.6	24.6	34.2	85	331	255	4304	3507	17	0	72	8.38	5.86	7	41	108
260	-114.104	29.3704	1253	16.7	222	75	11	3.6	24.6	34.2	87	331	255	4298	3486	17	0	73	8.38	5.86	7	41	108
261	-114.104	29.3704	1226	16.8	217	74	11.1	3.7	24.7	34.3	81	332	256	4333	3565	16	0	69	8.25	5.86	7	41	105
262	-114.104	29.3703	1246	16.8	222	75	11.1	3.6	24.7	34.2	84	332	257	4313	3527	16	0	72	8.38	5.86	7	41	108
263	-114.104	29.3703	1261	16.7	224	77	11	3.6	24.6	34.2	87	331	256	4294	3483	17	0	75	8.62	6.14	7	43	108
264	-114.104	29.3702	1290	16.6	227	78	10.9	3.5	24.5	34.1	86	331	255	4259	3466	17	0	79	8.75	6.14	7	43	110
265	-114.104	29.3701	1250	16.8	222	75	11	3.6	24.6	34.2	84	332	257	4306	3524	17	0	72	8.38	5.86	7	41	108
266	-114.104	29.3701	1287	16.6	227	78	10.9	3.5	24.5	34.1	86	331	255	4262	3470	17	0	79	8.75	6.14	7	43	110
267	-114.104	29.37	1232	16.8	218	75	11.1	3.7	24.7	34.3	84	332	257	4330	3539	16	0	70	8.38	5.86	7	41	105
268	-114.104	29.3699	1228	16.8	217	74	11.1	3.7	24.7	34.3	84	332	256	4330	3539	16	0	69	8.25	5.86	7	41	105
269	-114.104	29.3699	1246	16.8	222	75	11.1	3.6	24.7	34.2	84	332	257	4313	3527	16	0	72	8.38	5.86	7	41	108
270	-114.104	29.3698	1223	16.8	217	74	11.1	3.7	24.7	34.3	81	332	256	4336	3568	16	0	68	8.25	5.86	7	41	105
271	-114.104	29.3698	1370	16.4	239	84	10.7	3.2	24.3	33.9	87	329	254	4164	3379	17	0	93	8.33	5.88	8	47	114
272	-114.105	29.3705	1370	16.4	240	84	10.6	3.2	24.4	34	86	329	254	4170	3398	18	0	93	8.33	5.88	8	47	115
273	-114.105	29.3707	1276	16.7	223	75	10.9	3.5	24.7	34.3	88	331	255	4281	3479	17	0	77	8.38	5.86	7	41	109
274	-114.099	29.3665	1279	16.7	223	75	10.9	3.5	24.7	34.3	88	331	255	4278	3476	17	0	77	8.38	5.86	7	41	109
275	-114.099	29.3666	1427	16.2	247	87	10.5	3	24.2	33.8	86	332	261	4105	3378	18	0	104	8.67	6.12	8	49	119
276	-114.099	29.3667	1407	16.2	245	86	10.5	3.1	24.3	33.9	86	331	258	4129	3388	18	0	99	8.56	6.12	8	49	118
277	-114.099	29.3667	1251	16.8	221	74	11	3.6	24.7	34.3	85	331	256	4307	3517	17	0	73	8.25	5.86	7	41	108
278	-114.099	29.3668	1405	16.2	245	86	10.5	3.1	24.3	33.9	86	330	258	4129	3380	18	0	99	8.56	6.12	8	49	118
279	-114.099	29.3668	1458	16.1	255	90	10.4	2.9	24.1	33.7	83	331	265	4069	3366	18	0	109	9	6.38	8	51	122
280	-114.099	29.3669	1385	16.3	241	84	10.6	3.1	24.4	33.9	86	329	254	4162	3395	18	0	97	8.33	5.88	8	47	116
281	-114.099	29.367	1385	16.3	241	84	10.6	3.1	24.4	33.9	86	329	254	4162	3395	18	0	97	8.33	5.88	8	47	116
282	-114.099	29.367	1252	16.7	222	75	11	3.6	24.6	34.2	85	331	255	4304	3507	17	0	72	8.38	5.86	7	41	108
283	-114.099	29.3671	1253	16.7	222	75	11	3.6	24.6	34.2	87	331	255	4298	3486	17	0	73	8.38	5.86	7	41	108
284	-114.1	29.3671	1226	16.8	217	74	11.1	3.7	24.7	34.3	81	332	256	4333	3565	16	0	69	8.25	5.86	7	41	105
285	-114.1	29.3671	1246	16.8	222	75	11.1	3.6	24.7	34.2	84	332	257	4313	3527	16	0	72	8.38	5.86	7	41	108
286	-114.1	29.3671	1261	16.7	224	77	11	3.6	24.6	34.2	87	331	256	4294	3483	17	0	75	8.62	6.14	7	43	108
287	-114.1	29.3671	1290	16.6	227	78	10.9	3.5	24.5	34.1	86	331	255	4259	3466	17	0	79	8.75	6.14	7	43	110
288	-114.1	29.3672	1250	16.8	222	75	11	3.6	24.6	34.2	84	332	257	4306	3524	17	0	72	8.38	5.86	7	41	108
289	-114.1	29.3672	1287	16.6	227	78	10.9	3.5	24.5	34.1	86	331	255	4262	3470	17	0	79	8.75	6.14	7	43	110
290	-114.1	29.3673	1232	16.8	218	75	11.1	3.7	24.7	34.3	84	332	257	4330	3539	16	0	70	8.38	5.86	7	41	105
291	-114.1	29.3673	1228	16.8	217	74	11.1	3.7	24.7	34.3	84	332	256	4330	3539	16	0	69	8.25	5.86	7	41	105
292	-114.1	29.3674	1246	16.8	222	75	11.1	3.6	24.7	34.2	84	332	257	4313	3527	16	0	72	8.38	5.86	7	41	108
293	-114.1	29.3674	1405	16.2	245	86	10.5	3.1	24.3	33.9	86	330	258	4129	3380	18	0	99	8.56	6.12	8	49	118
294	-114.1	29.3675	1458	16.1	255	90	10.4	2.9	24.1	33.7	83	331	265	4069	3366	18	0	109	9	6.38	8	51	122
295	-114.1	29.3675	1405	16.2	245	86	10.5	3.1	24.3	33.9	86	330	258	4129	3380	18	0	99	8.56	6.12	8	49	118
296	-114.1	29.3676	1458	16.1	255	90	10.4	2.9	24.1	33.7	83	331	265	4069	3366	18	0	109	9	6.38	8	51	122
297	-114.1	29.3676	1385	16.3	241	84	10.6	3.1	24.4	33.9	86	329	254	4162	3395	18	0	97	8.33	5.88	8	47	116
298	-114.1	29.3677	1385	16.3	241	84	10.6	3.1	24.4	33.9	86	329	254	4162	3395	18	0	97	8.33	5.88	8	47	116
299	-114.1	29.3677	1459	16.1	255	90	10.4	2.9	24.1	33.7	83	331	265	4069	3366	18	0	109	9	6.38	8	51	122
300	-114.1	29.3678	1486	16	259	94	10.3	2.8	24	33.6	82	331	261	4034	3348	19	0	114	7.55	5.89	9	53	122
301	-114.101	29.3678	1394	16.3	243	85	10.6	3.1	24.3	33.9	86	330	256	4149	3391	18	0	98	8.44	6	8	48	117
302	-114.101	29.3678	1393	16.3	243	85	10.6	3.1	24.3	33.9	86	330	256	4149	3391	18	0	98	8.44	6	8	48	117
303	-114.101	29.3679	1428	16.2	247	87	10.5	3	24.2	33.8	86	332	261	4105	3378	18	0	104	8.67	6.12	8	49	119
304	-114.101	29.3679	1388	16.3	241	84	10.6	3.1	24.4	33.9	86	330	256	4159	3400	18	0	97	8.33	5.88	8	47	116
305	-114.101	29.368	1410	16.2	246	87	10.5	3.1	24.3	33.9	86	332	260	4129	3396	18	0	101	8.67	6.12	8	49	118
306	-114.101	29.368	1498	16	263	96	10.2	2.8	24	33.6	86	327	249	4025	3286	19	0	118	7.73	6	9	54	123
307	-114.101	29.3681	1488	16	259	94	10.3	2.8	24	33.6	82	331	261	4034	3348	19	0	114	7.55	5.89	9	53	122
308	-114.101	29.3681	1492	16	261	95	10.3	2.8	24	33.6	84	331	260	4031	3334	19	0	115	7.64	5.89	9	53	123
309	-114.101	29.3682	1522	15.9	267	97	10.2	2.7	23.9	33.5	95	327	248	3995	3198	19	0	122	7.82	6.11	9	55	126
310	-114.101	29.3683	1487	16	259	94	10.3	2.8	24	33.6	82	331	261	4034	3348	19	0	114	7.55	5.89	9	53	122
311	-114.101	29.3683	1449	16.1	253	90	10.4	2.9	24.2	33.7	83	331	265	4084	3377	18	0	108	9	6.38	8	51	120
312	-114.101	29.3682	1389	16.3	242	84	10.6	3.1	24.4	33.9	86	330	256	4159	3400	18	0	98	8.33	5.88	8	47	117
313	-114.101	29.3679	1398	16.3	243	85	10.5	3.1	24.3	33.9	86	330	256	4141	3389	18	0	98	8.44	6	8	48	117
314	-114.101	29.3678	1397	16.3	243	85	10.5	3.1	24.3	33.9	86	330	256	4144	3391	18	0	98	8.44	6	8	48	117
315	-114.101	29.3677	1318	16.6	230	79	10.8	3.4	24.6	34.2	86	330	254	4236	3452	17	0	83	7.78	5.38	8	43	111
316	-114.101	29.3677	1305	16.6	228	77	10.8	3.4	24.6	34.2	87	330	254	4251	3457	17	0	82	8.62	6.14	7	43	111
317	-114.101	29.3676	1346	16.4	235	81	10.7	3.3	24.5	34.1	86	328	253	4200	3411	17	0	87	8	5.62	8	45	114
318	-114.101	29.3675	1409	16.2	246	87	10.5	3.1	24.3	33.9	86	332	260	4129	3396	18	0	101	8.67	6.12	8	49	118
319	-114.101	29.3674	1277	16.7	223	75	10.9	3.5	24.7	34.3	88	331	255	4281	3479	17	0	77	8.38	5.86	7	41	109
320	-114.1	29.3673	1443	16.1	252	89	10.4	2.9	24.2	33.8	84	331	264	4090	3377	18	0	108	8.89	6.38	8	51	120
321	-114.1	29.3673	1282	16.7	225	77	10.9	3.5	24.7	34.2	87	331	255	4278	3484	17	0	78	8.62	6.14	7	43	109
