# Supplementary material for: Predicting Pinus monophylla forest cover in the Baja California Desert by remote sensing
Source: PeerJ. 2018 Apr 4;6:e4603. doi: 10.7717/peerj.4603 (PMC5889705; doi:10.7717/peerj.4603)
Supplement: Supplemental Information 2 [file peerj-06-4603-s002.xlsx]

## Sheet: currentClim_derived
PointID	long	lat	elev	mat	map	gsp	mtcm	mmin	mtwm	mmax	sday	fday	ffp	dd5	gsdd5	d100	dd0	mmindd0	smrpb	smrsprpb	sprp	smrp	winp
0	-114.08	29.3638	1469	16.1	257	93	10.3	2.8	24.1	33.7	85	331	261	4063	3352	19	0	113	8.3	6.62	8	53	121
1	-114.081	29.3614	1475	16.1	258	93	10.3	2.8	24.1	33.7	85	331	260	4057	3349	19	0	114	8.3	6.62	8	53	122
2	-114.081	29.3605	1457	16.1	256	92	10.4	2.9	24.1	33.7	83	331	265	4069	3366	18	0	109	9.22	6.62	8	53	121
3	-114.079	29.3604	1418	16.2	248	88	10.5	3	24.3	33.9	86	331	260	4126	3388	18	0	103	8.78	6.25	8	50	118
4	-114.078	29.3611	1409	16.3	246	87	10.5	3	24.3	33.9	86	331	260	4135	3394	18	0	101	8.67	6.12	8	49	118
5	-114.078	29.362	1432	16.2	250	89	10.4	3	24.2	33.8	86	332	261	4102	3378	18	0	104	8.89	6.38	8	51	119
6	-114.078	29.3634	1476	16.1	258	93	10.3	2.8	24.1	33.7	85	331	260	4057	3349	19	0	114	8.3	6.62	8	53	122
7	-114.083	29.3634	1411	16.3	246	87	10.5	3	24.3	33.9	86	331	261	4132	3391	18	0	102	8.67	6.12	8	49	118
8	-114.085	29.3605	1350	16.4	238	84	10.7	3.2	24.5	34.1	86	328	253	4200	3411	17	0	89	8.33	5.88	8	47	114
9	-114.085	29.3577	1343	16.5	233	81	10.7	3.3	24.5	34.1	86	328	253	4209	3417	17	0	87	8	5.62	8	45	112
10	-114.089	29.3563	1289	16.6	226	77	10.9	3.4	24.6	34.2	87	331	255	4268	3475	17	0	79	8.62	6.14	7	43	110
11	-114.088	29.358	1274	16.7	224	77	10.9	3.5	24.7	34.3	88	331	255	4289	3482	17	0	77	8.62	6.14	7	43	108
12	-114.093	29.3566	1376	16.4	240	84	10.6	3.2	24.4	34	86	329	254	4167	3396	18	0	94	8.33	5.88	8	47	115
13	-114.093	29.3542	1360	16.4	238	84	10.7	3.2	24.4	34	86	329	254	4191	3413	17	0	92	8.33	5.88	8	47	114
14	-114.088	29.3516	1250	16.8	221	74	11	3.6	24.7	34.3	85	331	255	4310	3519	17	0	73	8.25	5.86	7	41	108
15	-114.088	29.3526	1250	16.8	221	74	11	3.6	24.7	34.3	85	331	255	4310	3519	17	0	73	8.25	5.86	7	41	108
16	-114.088	29.3536	1259	16.7	222	75	11	3.5	24.7	34.3	87	331	255	4304	3499	17	0	75	8.38	5.86	7	41	108
17	-114.086	29.3541	1266	16.7	222	75	10.9	3.5	24.7	34.3	88	331	255	4292	3482	17	0	76	8.38	5.86	7	41	108
18	-114.084	29.3528	1244	16.8	220	74	11	3.6	24.8	34.3	85	331	255	4325	3526	17	0	73	8.25	5.86	7	41	108
19	-114.08	29.3529	1266	16.7	223	76	10.9	3.5	24.7	34.3	88	331	255	4292	3482	17	0	76	8.5	6	7	42	108
20	-114.08	29.3558	1357	16.4	238	84	10.7	3.2	24.5	34	86	328	253	4200	3411	17	0	92	8.33	5.88	8	47	114
21	-114.082	29.3567	1424	16.2	249	89	10.5	3	24.2	33.8	86	332	261	4113	3383	18	0	103	8.89	6.38	8	51	118
22	-114.082	29.3581	1338	16.5	233	81	10.7	3.3	24.5	34.1	86	328	253	4215	3423	17	0	87	8	5.62	8	45	112
23	-114.081	29.3582	1326	16.6	231	80	10.8	3.3	24.6	34.1	86	329	253	4236	3444	17	0	86	9	6.43	7	45	111
24	-114.079	29.3567	1272	16.7	224	77	10.9	3.5	24.7	34.3	88	331	255	4292	3482	17	0	77	8.62	6.14	7	43	108
25	-114.078	29.3585	1308	16.6	230	80	10.8	3.4	24.6	34.2	87	330	254	4251	3457	17	0	83	9	6.43	7	45	111
26	-114.078	29.3592	1362	16.4	238	84	10.7	3.2	24.5	34	86	328	253	4194	3408	17	0	93	8.33	5.88	8	47	114
27	-114.08	29.36	1408	16.3	246	87	10.5	3.1	24.3	33.9	86	332	260	4132	3399	18	0	100	8.67	6.12	8	49	118
28	-114.082	29.3601	1471	16.1	258	93	10.3	2.8	24.1	33.7	85	331	260	4057	3349	19	0	114	8.3	6.62	8	53	122
29	-114.083	29.3595	1386	16.3	243	86	10.6	3.1	24.4	34	85	329	254	4162	3402	18	0	97	8.56	6.12	8	49	116
30	-114.087	29.3592	1280	16.7	224	77	10.9	3.5	24.7	34.3	88	331	255	4281	3479	17	0	77	8.62	6.14	7	43	108
31	-114.088	29.36	1321	16.6	231	80	10.8	3.3	24.6	34.1	86	330	254	4236	3452	17	0	84	9	6.43	7	45	111
32	-114.087	29.3611	1324	16.6	231	80	10.8	3.3	24.6	34.1	86	329	253	4236	3444	17	0	86	9	6.43	7	45	111
33	-114.085	29.3605	1350	16.4	238	84	10.7	3.2	24.5	34.1	86	328	253	4200	3411	17	0	89	8.33	5.88	8	47	114
34	-114.085	29.3593	1327	16.5	231	80	10.8	3.3	24.5	34.1	86	329	253	4233	3441	17	0	86	9	6.43	7	45	111
35	-114.086	29.3567	1317	16.6	231	80	10.8	3.4	24.6	34.1	87	330	254	4239	3448	17	0	83	9	6.43	7	45	111
36	-114.088	29.3552	1231	16.8	217	74	11	3.6	24.8	34.4	82	332	257	4331	3564	17	0	71	8.25	5.86	7	41	105
37	-114.089	29.3558	1273	16.7	224	77	10.9	3.5	24.7	34.3	88	331	255	4292	3482	17	0	77	8.62	6.14	7	43	108
38	-114.091	29.3603	1388	16.3	242	85	10.6	3.1	24.4	33.9	86	329	254	4162	3395	18	0	97	8.44	6	8	48	116
39	-114.088	29.3608	1320	16.6	231	80	10.8	3.3	24.6	34.1	86	330	255	4236	3452	17	0	84	9	6.43	7	45	111
40	-114.077	29.355	1255	16.8	222	75	11	3.6	24.7	34.3	87	331	255	4307	3502	17	0	74	8.38	5.86	7	41	108
41	-114.078	29.3533	1289	16.7	225	77	10.9	3.5	24.6	34.2	87	331	255	4275	3481	17	0	78	8.62	6.14	7	43	109
42	-114.08	29.3514	1203	16.9	213	72	11.1	3.7	24.9	34.4	76	332	261	4367	3635	16	0	67	8	5.57	7	39	104
43	-114.086	29.3499	1191	16.9	211	71	11.2	3.8	24.9	34.4	76	332	261	4376	3640	16	0	65	7.88	5.57	7	39	103
44	-114.088	29.3491	1171	17	207	69	11.2	3.8	24.9	34.5	73	334	269	4399	3698	16	0	63	7.62	5.29	7	37	102
45	-114.091	29.3496	1208	16.9	213	72	11.1	3.7	24.8	34.4	79	332	257	4354	3599	16	0	68	8	5.57	7	39	104
46	-114.089	29.3473	1239	16.8	220	74	11	3.6	24.8	34.3	85	331	255	4322	3523	17	0	73	8.25	5.86	7	41	108
47	-114.083	29.3467	1246	16.8	221	74	11	3.6	24.7	34.3	85	331	255	4316	3519	17	0	73	8.25	5.86	7	41	108
48	-114.081	29.3477	1133	17.1	202	66	11.3	4	25	34.5	69	335	274	4435	3763	16	0	58	7.25	5	7	35	100
49	-114.08	29.3467	1183	17	210	70	11.2	3.8	24.9	34.5	75	332	261	4390	3656	16	0	65	7.75	5.43	7	38	103
50	-114.081	29.3482	1121	17.1	202	66	11.4	4	25	34.6	68	335	274	4446	3775	16	0	57	7.25	5	7	35	100
51	-114.08	29.3481	1132	17.1	202	66	11.3	4	25	34.6	69	335	274	4435	3763	16	0	58	7.25	5	7	35	100
52	-114.078	29.3473	1161	17	206	69	11.2	3.9	25	34.5	73	334	269	4405	3704	16	0	61	7.62	5.29	7	37	101
53	-114.078	29.3483	1098	17.2	198	66	11.4	4.1	25.1	34.6	66	336	276	4474	3822	16	0	54	7.25	5	7	35	97
54	-114.078	29.3479	1108	17.2	200	66	11.4	4	25.1	34.6	67	336	275	4462	3803	16	0	55	7.25	5	7	35	99
55	-114.077	29.3493	1157	17	206	69	11.3	3.9	25	34.5	72	334	269	4411	3714	16	0	61	7.62	5.29	7	37	101
56	-114.073	29.3465	1061	17.3	193	62	11.5	4.2	25.2	34.7	63	338	282	4506	3884	15	0	49	7.86	5.5	6	33	96
57	-114.074	29.3496	1139	17.1	203	67	11.3	3.9	25	34.5	69	335	274	4435	3763	16	0	58	7.38	5.14	7	36	100
58	-114.074	29.3486	1121	17.1	201	66	11.4	4	25	34.6	68	335	274	4446	3775	16	0	57	7.25	5	7	35	99
59	-114.075	29.348	1086	17.3	195	63	11.5	4.1	25.1	34.6	64	337	277	4488	3851	15	0	52	6.88	4.71	7	33	97
60	-114.081	29.3461	1217	16.9	213	72	11.1	3.7	24.8	34.4	81	332	257	4352	3583	16	0	69	8	5.57	7	39	104
61	-114.079	29.3479	1125	17.1	202	66	11.3	4	25	34.6	68	335	274	4441	3775	16	0	57	7.25	5	7	35	100
62	-114.078	29.3483	1098	17.2	198	66	11.4	4.1	25.1	34.6	66	336	276	4474	3822	16	0	54	7.25	5	7	35	97
63	-114.077	29.3509	1224	16.9	215	73	11.1	3.7	24.8	34.4	81	332	257	4346	3583	16	0	69	8.12	5.71	7	40	104
64	-114.076	29.3516	1246	16.8	221	75	11	3.6	24.8	34.3	85	331	255	4322	3526	17	0	73	8.38	5.86	7	41	108
65	-114.074	29.3527	1175	17	207	69	11.2	3.8	24.9	34.5	73	334	269	4399	3698	16	0	63	7.62	5.29	7	37	102
66	-114.075	29.3509	1179	17	208	70	11.2	3.8	24.9	34.5	75	333	261	4390	3665	16	0	64	7.75	5.43	7	38	102
67	-114.073	29.3501	1158	17	206	69	11.2	3.9	25	34.5	72	334	269	4408	3714	16	0	61	7.62	5.29	7	37	101
68	-114.072	29.3491	1127	17.1	202	66	11.3	4	25	34.6	68	335	274	4441	3775	16	0	57	7.25	5	7	35	100
69	-114.073	29.3516	1213	16.9	213	72	11.1	3.7	24.8	34.4	81	332	257	4358	3587	16	0	69	8	5.57	7	39	104
70	-114.073	29.3529	1138	17.1	203	67	11.3	3.9	25	34.6	69	335	274	4435	3763	16	0	58	7.38	5.14	7	36	100
71	-114.073	29.3546	1163	17	206	69	11.2	3.9	25	34.5	73	334	269	4405	3704	16	0	61	7.62	5.29	7	37	101
72	-114.072	29.3565	1255	16.8	222	75	11	3.6	24.8	34.3	87	331	255	4310	3505	17	0	74	8.38	5.86	7	41	108
73	-114.073	29.3571	1215	16.9	213	72	11.1	3.7	24.9	34.4	81	332	257	4358	3590	16	0	69	8	5.57	7	39	104
74	-114.075	29.3562	1234	16.8	217	74	11	3.6	24.8	34.4	82	332	257	4334	3567	17	0	71	8.25	5.86	7	41	105
75	-114.076	29.3549	1209	16.9	213	72	11.1	3.7	24.9	34.4	79	332	257	4361	3606	16	0	68	8	5.57	7	39	104
76	-114.076	29.3538	1267	16.7	224	77	10.9	3.5	24.7	34.3	88	331	255	4292	3482	17	0	77	8.62	6.14	7	43	108
77	-114.077	29.3515	1233	16.8	217	74	11	3.6	24.8	34.4	82	332	257	4334	3567	17	0	71	8.25	5.86	7	41	105
78	-114.084	29.3513	1202	16.9	213	72	11.1	3.7	24.9	34.4	76	332	261	4367	3635	16	0	67	8	5.57	7	39	104
79	-114.087	29.3514	1189	16.9	211	71	11.2	3.8	24.9	34.4	76	332	261	4379	3643	16	0	65	7.88	5.57	7	39	103
80	-114.091	29.3512	1244	16.8	221	74	11	3.6	24.8	34.3	85	331	255	4322	3523	17	0	73	8.25	5.86	7	41	108
81	-114.093	29.351	1267	16.7	222	75	10.9	3.5	24.7	34.3	88	331	255	4292	3482	17	0	77	8.38	5.86	7	41	108
82	-114.093	29.3487	1225	16.8	213	72	11.1	3.7	24.8	34.4	81	332	257	4337	3574	16	0	69	8	5.57	7	39	104
83	-114.093	29.3477	1228	16.8	214	72	11.1	3.7	24.8	34.4	82	332	257	4337	3567	16	0	70	8	5.57	7	39	105
84	-114.093	29.3466	1229	16.8	214	72	11.1	3.7	24.8	34.4	82	332	257	4331	3561	16	0	70	8	5.57	7	39	105
85	-114.091	29.3464	1225	16.8	214	72	11.1	3.7	24.8	34.4	81	332	257	4337	3574	16	0	69	8	5.57	7	39	105
86	-114.091	29.3469	1222	16.9	213	72	11.1	3.7	24.8	34.4	81	332	257	4343	3580	16	0	69	8	5.57	7	39	104
87	-114.092	29.3474	1218	16.9	213	72	11.1	3.7	24.8	34.4	81	332	257	4349	3583	16	0	69	8	5.57	7	39	104
88	-114.092	29.3474	1218	16.9	213	72	11.1	3.7	24.8	34.4	81	332	257	4349	3583	16	0	69	8	5.57	7	39	104
89	-114.092	29.3483	1222	16.9	213	72	11.1	3.7	24.8	34.4	81	332	257	4343	3580	16	0	69	8	5.57	7	39	104
90	-114.092	29.3483	1222	16.9	213	72	11.1	3.7	24.8	34.4	81	332	257	4343	3580	16	0	69	8	5.57	7	39	104
91	-114.08	29.376	1321	16.6	230	80	10.8	3.3	24.6	34.2	86	329	253	4242	3450	17	0	85	9	6.43	7	45	111
92	-114.08	29.3747	1383	16.4	240	86	10.6	3.1	24.4	34	85	329	254	4171	3409	18	0	97	8.56	6.12	8	49	114
93	-114.08	29.3735	1368	16.4	238	84	10.6	3.2	24.5	34	86	328	253	4189	3408	18	0	93	8.33	5.88	8	47	114
94	-114.08	29.3735	1368	16.4	238	84	10.6	3.2	24.5	34	86	328	253	4189	3408	18	0	93	8.33	5.88	8	47	114
95	-114.079	29.3746	1364	16.4	238	84	10.6	3.2	24.5	34	86	328	253	4192	3411	18	0	92	8.33	5.88	8	47	114
96	-114.079	29.3762	1327	16.5	231	80	10.7	3.3	24.6	34.2	86	329	253	4233	3444	17	0	86	9	6.43	7	45	111
97	-114.077	29.3754	1362	16.4	238	84	10.6	3.2	24.5	34.1	86	328	253	4194	3411	18	0	92	8.33	5.88	8	47	114
98	-114.077	29.3744	1365	16.4	238	84	10.6	3.2	24.5	34	86	328	253	4192	3411	18	0	92	8.33	5.88	8	47	114
99	-114.078	29.3756	1345	16.5	235	83	10.7	3.2	24.5	34.1	86	328	253	4212	3423	17	0	88	8.22	5.88	8	47	112
100	-114.078	29.3778	1300	16.6	228	78	10.8	3.4	24.7	34.2	87	331	255	4269	3478	17	0	81	8.75	6.14	7	43	111
101	-114.079	29.3783	1294	16.6	224	77	10.8	3.4	24.7	34.3	87	331	255	4271	3481	17	0	81	8.62	6.14	7	43	108
102	-114.081	29.3764	1323	16.6	231	80	10.7	3.3	24.6	34.2	86	329	253	4239	3450	17	0	85	9	6.43	7	45	111
103	-114.084	29.3771	1342	16.5	233	81	10.7	3.3	24.5	34.1	86	328	252	4215	3426	17	0	87	8	5.62	8	45	112
104	-114.082	29.3769	1325	16.5	231	80	10.7	3.3	24.6	34.2	86	329	253	4233	3444	17	0	85	9	6.43	7	45	111
105	-114.08	29.3766	1315	16.6	230	80	10.8	3.3	24.6	34.2	87	330	255	4245	3454	17	0	84	9	6.43	7	45	111
106	-114.079	29.3762	1327	16.5	231	80	10.7	3.3	24.6	34.2	86	329	253	4233	3444	17	0	86	9	6.43	7	45	111
107	-114.077	29.3766	1313	16.6	230	80	10.8	3.4	24.6	34.2	87	330	254	4248	3457	17	0	83	9	6.43	7	45	111
108	-114.077	29.3766	1313	16.6	230	80	10.8	3.4	24.6	34.2	87	330	254	4248	3457	17	0	83	9	6.43	7	45	111
109	-114.075	29.3761	1308	16.6	230	80	10.8	3.4	24.6	34.2	87	330	254	4254	3463	17	0	83	9	6.43	7	45	111
110	-114.075	29.3751	1292	16.7	224	77	10.8	3.4	24.7	34.3	87	331	255	4278	3487	17	0	81	8.62	6.14	7	43	108
111	-114.075	29.3717	1416	16.3	248	89	10.5	3	24.3	33.9	86	331	261	4132	3394	18	0	103	8.89	6.38	8	51	118
112	-114.1	29.3467	1283	16.6	226	77	10.9	3.5	24.6	34.2	87	331	255	4271	3475	17	0	78	8.62	6.14	7	43	110
113	-114.1	29.3467	1283	16.6	226	77	10.9	3.5	24.6	34.2	87	331	255	4271	3475	17	0	78	8.62	6.14	7	43	110
114	-114.102	29.3458	1245	16.8	221	74	11	3.6	24.7	34.3	85	331	255	4316	3519	17	0	73	8.25	5.86	7	41	108
115	-114.102	29.3458	1245	16.8	221	74	11	3.6	24.7	34.3	85	331	255	4316	3519	17	0	73	8.25	5.86	7	41	108
116	-114.101	29.3477	1320	16.5	232	81	10.8	3.4	24.5	34.1	86	330	254	4230	3446	17	0	83	8	5.62	8	45	111
117	-114.101	29.3466	1303	16.6	228	77	10.8	3.4	24.6	34.2	86	330	254	4250	3461	17	0	81	8.62	6.14	7	43	111
118	-114.102	29.3437	1219	16.9	213	72	11.1	3.7	24.8	34.4	81	332	257	4343	3577	16	0	69	8	5.57	7	39	104
119	-114.103	29.3436	1201	16.9	212	71	11.1	3.7	24.8	34.4	76	332	261	4354	3622	16	0	67	7.88	5.57	7	39	104
120	-114.103	29.3418	1153	17.1	203	66	11.3	3.9	24.9	34.5	73	334	269	4414	3703	16	0	61	7.25	5	7	35	101
121	-114.102	29.3425	1168	17	208	69	11.2	3.9	24.9	34.5	73	334	269	4390	3689	16	0	62	7.62	5.29	7	37	102
122	-114.102	29.343	1187	16.9	210	69	11.2	3.8	24.9	34.4	76	332	261	4373	3637	16	0	65	7.62	5.29	7	37	104
123	-114.101	29.3434	1214	16.9	213	72	11.1	3.7	24.8	34.4	81	332	257	4354	3584	16	0	69	8	5.57	7	39	104
124	-114.098	29.343	1233	16.8	218	72	11	3.6	24.8	34.3	82	332	257	4322	3555	17	0	71	8	5.57	7	39	108
125	-114.096	29.3452	1268	16.7	222	75	10.9	3.5	24.7	34.3	88	331	255	4289	3479	17	0	76	8.38	5.86	7	41	108
126	-114.092	29.3421	1240	16.8	221	74	11	3.6	24.7	34.3	85	331	255	4319	3520	17	0	72	8.25	5.86	7	41	108
127	-114.092	29.3409	1237	16.8	220	74	11	3.6	24.7	34.3	84	332	257	4319	3536	17	0	71	8.25	5.86	7	41	108
128	-114.094	29.3402	1226	16.8	214	72	11.1	3.7	24.8	34.3	82	332	257	4334	3564	16	0	70	8	5.57	7	39	105
129	-114.095	29.3413	1215	16.9	213	72	11.1	3.7	24.8	34.4	81	332	257	4354	3584	16	0	69	8	5.57	7	39	104
130	-114.094	29.3429	1232	16.8	217	72	11	3.6	24.8	34.3	82	332	257	4325	3558	17	0	71	8	5.57	7	39	107
131	-114.092	29.3421	1240	16.8	221	74	11	3.6	24.7	34.3	85	331	255	4319	3520	17	0	72	8.25	5.86	7	41	108
132	-114.093	29.339	1239	16.8	221	74	11	3.6	24.7	34.3	84	332	257	4319	3536	17	0	71	8.25	5.86	7	41	108
133	-114.093	29.3355	1220	16.8	213	72	11.1	3.7	24.8	34.4	81	332	256	4340	3574	16	0	69	8	5.57	7	39	104
134	-114.096	29.3351	1168	17	208	69	11.2	3.9	24.9	34.5	73	334	269	4393	3692	16	0	61	7.62	5.29	7	37	102
135	-114.098	29.3319	1130	17.1	203	66	11.3	4	25	34.5	70	335	273	4429	3748	16	0	58	7.25	5	7	35	101
136	-114.1	29.332	1118	17.1	202	66	11.4	4	25	34.5	67	335	275	4446	3780	16	0	56	7.25	5	7	35	100
137	-114.1	29.3339	1119	17.1	202	66	11.4	4	25	34.5	67	335	275	4446	3780	16	0	56	7.25	5	7	35	100
138	-114.101	29.3363	1099	17.2	198	63	11.4	4.1	25	34.6	67	336	275	4459	3799	16	0	54	6.88	4.71	7	33	99
139	-114.104	29.3377	1014	17.4	184	57	11.7	4.3	25.2	34.7	61	339	285	4538	3923	15	0	45	7.14	4.83	6	29	93
140	-114.103	29.3397	1107	17.1	199	64	11.4	4.1	25	34.6	67	336	275	4449	3790	16	0	54	7	4.71	7	33	99
141	-114.102	29.3397	1112	17.1	201	66	11.4	4	25	34.6	67	335	275	4449	3783	16	0	55	7.25	5	7	35	99
142	-114.1	29.3417	1190	16.9	210	69	11.2	3.8	24.9	34.4	76	332	261	4373	3637	16	0	65	7.62	5.29	7	37	104
143	-114.099	29.3439	1255	16.7	221	74	11	3.6	24.7	34.3	87	331	256	4298	3493	17	0	74	8.25	5.86	7	41	108
144	-114.099	29.3452	1261	16.7	222	75	11	3.6	24.7	34.3	87	331	256	4295	3490	17	0	74	8.38	5.86	7	41	108
145	-114.095	29.3468	1257	16.7	222	75	11	3.6	24.7	34.3	87	331	256	4298	3493	17	0	74	8.38	5.86	7	41	108
146	-114.097	29.3482	1260	16.7	222	75	11	3.6	24.7	34.3	87	331	256	4295	3490	17	0	74	8.38	5.86	7	41	108
147	-114.1	29.3512	1328	16.5	233	81	10.8	3.3	24.5	34.1	86	329	253	4224	3432	17	0	86	8	5.62	8	45	112
148	-114.1	29.3519	1344	16.5	235	81	10.7	3.3	24.5	34.1	87	328	253	4203	3404	17	0	89	8	5.62	8	45	114
149	-114.102	29.3492	1333	16.5	233	81	10.7	3.3	24.5	34.1	86	329	253	4215	3428	17	0	86	8	5.62	8	45	112
150	-114.102	29.3482	1343	16.5	235	81	10.7	3.3	24.5	34.1	87	328	253	4203	3404	17	0	89	8	5.62	8	45	114
151	-114.103	29.3442	1203	16.9	212	71	11.1	3.7	24.8	34.4	76	332	261	4354	3622	16	0	67	7.88	5.57	7	39	104
152	-114.105	29.3433	1198	16.9	210	69	11.1	3.8	24.8	34.4	76	332	261	4354	3622	16	0	66	7.62	5.29	7	37	104
153	-114.107	29.3414	1024	17.4	187	59	11.6	4.3	25.2	34.7	61	339	285	4532	3923	15	0	45	7.43	5.17	6	31	93
154	-114.109	29.3379	1091	17.2	197	63	11.4	4.1	25	34.6	64	336	277	4464	3829	16	0	52	6.88	4.71	7	33	98
155	-114.064	29.2897	1276	16.7	225	77	11	3.5	24.6	34.1	87	331	255	4280	3471	17	0	76	8.62	6.14	7	43	109
156	-114.064	29.2882	1258	16.7	222	75	11	3.6	24.6	34.2	87	331	255	4294	3483	17	0	73	8.38	5.86	7	41	108
157	-114.065	29.288	1290	16.6	228	78	10.9	3.5	24.5	34.1	86	331	255	4259	3466	17	0	79	8.75	6.14	7	43	111
158	-114.066	29.2887	1299	16.6	229	78	10.9	3.5	24.5	34.1	86	331	255	4250	3461	17	0	79	8.75	6.14	7	43	111
159	-114.066	29.2912	1339	16.5	235	82	10.8	3.3	24.4	34	87	329	253	4203	3406	17	0	88	8.11	5.62	8	45	113
160	-114.066	29.2905	1320	16.5	232	81	10.8	3.4	24.4	34	86	330	254	4223	3433	17	0	85	8	5.62	8	45	111
161	-114.067	29.2892	1334	16.5	235	82	10.8	3.4	24.4	34	86	330	254	4206	3422	17	0	86	8.11	5.62	8	45	113
162	-114.068	29.29	1361	16.4	239	84	10.7	3.3	24.3	33.9	87	329	253	4176	3385	17	0	90	8.33	5.88	8	47	114
163	-114.069	29.2912	1372	16.4	240	84	10.7	3.2	24.3	33.9	87	329	254	4164	3379	17	0	93	8.33	5.88	8	47	115
164	-114.068	29.2923	1399	16.3	246	87	10.6	3.1	24.2	33.8	86	331	259	4131	3378	18	0	98	8.67	6.12	8	49	118
165	-114.069	29.2939	1397	16.3	246	87	10.6	3.1	24.2	33.8	86	330	258	4131	3370	18	0	98	8.67	6.12	8	49	118
166	-114.07	29.2934	1381	16.3	243	86	10.7	3.2	24.3	33.9	86	330	257	4158	3389	17	0	94	8.56	6.12	8	49	116
167	-114.071	29.2922	1369	16.4	239	84	10.7	3.2	24.3	33.9	87	329	254	4167	3379	17	0	93	8.33	5.88	8	47	114
168	-114.071	29.2886	1282	16.6	226	77	11	3.5	24.5	34.1	86	331	255	4265	3470	17	0	78	8.62	6.14	7	43	110
169	-114.072	29.2871	1273	16.7	225	77	11	3.6	24.6	34.1	87	331	255	4280	3471	17	0	75	8.62	6.14	7	43	109
170	-114.073	29.2872	1254	16.7	222	75	11	3.6	24.6	34.2	87	331	255	4298	3486	17	0	73	8.38	5.86	7	41	108
171	-114.076	29.2878	1262	16.7	222	75	11	3.6	24.6	34.2	87	331	255	4288	3477	17	0	75	8.38	5.86	7	41	108
172	-114.073	29.2906	1303	16.6	230	79	10.9	3.5	24.5	34.1	86	330	254	4247	3449	17	0	79	7.78	5.38	8	43	111
173	-114.073	29.2924	1342	16.4	236	82	10.8	3.3	24.4	34	87	329	253	4199	3403	17	0	89	8.11	5.62	8	45	114
174	-114.073	29.2944	1312	16.6	232	81	10.9	3.4	24.5	34.1	86	330	254	4235	3443	17	0	84	8	5.62	8	45	111
175	-114.066	29.2975	1407	16.2	247	87	10.6	3.1	24.2	33.8	86	331	259	4125	3376	18	0	99	8.67	6.12	8	49	118
176	-114.068	29.2959	1351	16.4	238	84	10.7	3.3	24.4	33.9	87	329	253	4190	3397	17	0	89	8.33	5.88	8	47	114
177	-114.073	29.2956	1302	16.6	229	78	10.9	3.5	24.5	34.1	86	330	254	4250	3452	17	0	79	8.75	6.14	7	43	111
178	-114.072	29.2992	1298	16.6	229	78	10.9	3.5	24.5	34.1	86	331	255	4253	3464	17	0	79	8.75	6.14	7	43	111
179	-114.071	29.2977	1311	16.6	232	81	10.9	3.4	24.5	34.1	86	330	254	4238	3446	17	0	84	8	5.62	8	45	111
180	-114.071	29.2958	1313	16.6	232	81	10.9	3.4	24.5	34.1	86	330	254	4235	3443	17	0	84	8	5.62	8	45	111
181	-114.071	29.2958	1313	16.6	232	81	10.9	3.4	24.5	34.1	86	330	254	4235	3443	17	0	84	8	5.62	8	45	111
182	-114.071	29.2966	1311	16.6	232	81	10.9	3.4	24.5	34.1	86	330	254	4238	3446	17	0	84	8	5.62	8	45	111
183	-114.069	29.2972	1322	16.5	232	81	10.8	3.4	24.4	34	86	330	254	4220	3431	17	0	85	8	5.62	8	45	111
184	-114.069	29.298	1327	16.5	233	81	10.8	3.4	24.4	34	86	330	254	4217	3431	17	0	85	8	5.62	8	45	112
185	-114.069	29.2991	1327	16.5	233	81	10.8	3.4	24.4	34	86	330	254	4217	3431	17	0	85	8	5.62	8	45	112
186	-114.067	29.3	1356	16.4	238	84	10.7	3.3	24.4	33.9	87	329	253	4188	3397	17	0	89	8.33	5.88	8	47	114
187	-114.065	29.3002	1405	16.2	247	87	10.6	3.1	24.2	33.8	86	331	259	4128	3378	18	0	99	8.67	6.12	8	49	118
188	-114.064	29.2997	1428	16.2	252	90	10.5	3	24.1	33.7	86	333	262	4098	3373	18	0	104	9	6.38	8	51	119
189	-114.063	29.3023	1397	16.3	245	87	10.6	3.1	24.2	33.8	86	330	258	4137	3376	18	0	98	8.67	6.12	8	49	117
190	-114.06	29.3015	1431	16.2	252	90	10.5	3	24.1	33.7	86	333	262	4095	3373	18	0	104	9	6.38	8	51	119
191	-114.06	29.3001	1442	16.1	254	91	10.5	3	24.1	33.7	85	332	261	4087	3366	18	0	105	8.1	6.38	8	51	120
192	-114.062	29.2999	1432	16.2	252	90	10.5	3	24.1	33.7	86	333	262	4095	3373	18	0	104	9	6.38	8	51	119
193	-114.062	29.2978	1392	16.3	245	87	10.6	3.2	24.2	33.8	87	330	257	4143	3375	18	0	96	8.67	6.12	8	49	117
194	-114.061	29.2974	1387	16.3	245	87	10.6	3.2	24.3	33.8	87	330	257	4152	3382	18	0	95	8.67	6.12	8	49	117
195	-114.061	29.2974	1387	16.3	245	87	10.6	3.2	24.3	33.8	87	330	257	4152	3382	18	0	95	8.67	6.12	8	49	117
196	-114.061	29.2974	1387	16.3	245	87	10.6	3.2	24.3	33.8	87	330	257	4152	3382	18	0	95	8.67	6.12	8	49	117
197	-114.052	29.3001	1225	16.8	217	74	11.1	3.7	24.7	34.3	81	332	256	4339	3571	16	0	68	8.25	5.86	7	41	105
198	-114.051	29.3011	1219	16.9	217	74	11.1	3.7	24.7	34.3	77	332	261	4342	3603	16	0	68	8.25	5.86	7	41	105
199	-114.049	29.3012	1205	16.9	214	72	11.2	3.8	24.8	34.3	78	332	261	4360	3607	16	0	67	8	5.57	7	39	104
200	-114.076	29.3034	1303	16.6	229	78	10.9	3.4	24.5	34.1	86	330	254	4247	3452	17	0	80	8.75	6.14	7	43	111
201	-114.076	29.2996	1265	16.7	222	75	11	3.6	24.6	34.2	87	331	256	4286	3477	17	0	75	8.38	5.86	7	41	108
202	-114.073	29.2994	1289	16.6	228	78	10.9	3.5	24.5	34.1	86	331	255	4259	3466	17	0	79	8.75	6.14	7	43	111
203	-114.072	29.3027	1304	16.6	231	80	10.9	3.4	24.5	34.1	86	330	254	4247	3452	17	0	80	9	6.43	7	45	111
204	-114.069	29.3013	1320	16.5	232	81	10.8	3.4	24.5	34	86	330	254	4226	3437	17	0	85	8	5.62	8	45	111
205	-114.07	29.2997	1324	16.5	232	81	10.8	3.4	24.4	34	86	330	254	4217	3431	17	0	85	8	5.62	8	45	111
206	-114.071	29.2987	1309	16.6	232	81	10.9	3.4	24.5	34.1	86	330	254	4238	3446	17	0	82	8	5.62	8	45	111
207	-114.072	29.2972	1293	16.6	228	78	10.9	3.5	24.5	34.1	86	331	255	4253	3464	17	0	79	8.75	6.14	7	43	111
208	-114.07	29.2949	1337	16.5	235	82	10.8	3.3	24.4	34	86	330	254	4206	3422	17	0	87	8.11	5.62	8	45	113
209	-114.049	29.2877	1085	17.2	198	65	11.5	4.2	25	34.6	64	337	278	4482	3842	15	0	50	7.12	4.86	7	34	98
210	-114.046	29.2866	1037	17.4	190	61	11.7	4.3	25.1	34.6	63	339	283	4532	3900	15	0	46	7.71	5.33	6	32	94
211	-114.046	29.2881	1039	17.4	191	62	11.7	4.3	25.1	34.6	63	339	283	4532	3900	15	0	46	7.86	5.5	6	33	94
212	-114.044	29.2866	1018	17.4	187	59	11.7	4.4	25.1	34.6	62	341	285	4544	3930	15	0	43	7.43	5.17	6	31	94
213	-114.044	29.2882	1016	17.4	187	59	11.7	4.4	25.1	34.6	62	341	285	4549	3935	15	0	43	7.43	5.17	6	31	94
214	-114.044	29.2898	1006	17.5	186	59	11.8	4.4	25.2	34.7	60	341	285	4565	3964	15	0	42	7.43	5.17	6	31	93
215	-114.043	29.2918	995	17.5	185	59	11.8	4.4	25.2	34.7	59	341	285	4568	3975	15	0	42	7.43	5.17	6	31	92
216	-114.042	29.2888	986	17.5	184	58	11.8	4.5	25.2	34.7	58	345	292	4579	4022	15	0	40	7.29	5	6	30	92
217	-114.043	29.2878	1003	17.5	186	59	11.8	4.4	25.2	34.7	60	341	285	4568	3968	15	0	42	7.43	5.17	6	31	93
218	-114.044	29.2882	1016	17.4	187	59	11.7	4.4	25.1	34.6	62	341	285	4549	3935	15	0	43	7.43	5.17	6	31	94
219	-114.046	29.2895	1033	17.4	189	60	11.7	4.3	25.1	34.6	61	339	283	4535	3920	15	0	45	7.57	5.17	6	31	94
220	-114.045	29.2899	1021	17.4	188	60	11.7	4.4	25.1	34.6	61	340	285	4538	3930	15	0	44	7.57	5.17	6	31	94
221	-114.045	29.2913	1016	17.4	186	59	11.7	4.4	25.1	34.6	62	341	285	4553	3938	15	0	43	7.43	5.17	6	31	93
222	-114.045	29.2926	1014	17.4	186	59	11.7	4.4	25.2	34.7	62	341	285	4556	3942	15	0	43	7.43	5.17	6	31	93
223	-114.041	29.2935	980	17.5	182	57	11.8	4.5	25.2	34.7	58	345	292	4588	4028	15	0	39	7.14	4.83	6	29	91
224	-114.041	29.2935	980	17.5	182	57	11.8	4.5	25.2	34.7	58	345	292	4588	4028	15	0	39	7.14	4.83	6	29	91
225	-114.041	29.2908	982	17.5	182	57	11.8	4.5	25.2	34.7	58	345	292	4585	4025	15	0	40	7.14	4.83	6	29	91
226	-114.043	29.2906	999	17.5	185	59	11.8	4.4	25.2	34.7	59	341	285	4568	3975	15	0	42	7.43	5.17	6	31	92
227	-114.047	29.2909	1033	17.4	189	60	11.7	4.3	25.1	34.6	61	339	283	4532	3917	15	0	45	7.57	5.17	6	31	94
228	-114.079	29.3805	1304	16.6	230	80	10.8	3.4	24.7	34.2	87	330	255	4260	3469	17	0	81	9	6.43	7	45	111
229	-114.079	29.3805	1304	16.6	230	80	10.8	3.4	24.7	34.2	87	330	255	4260	3469	17	0	81	9	6.43	7	45	111
230	-114.079	29.3783	1294	16.6	224	77	10.8	3.4	24.7	34.3	87	331	255	4271	3481	17	0	81	8.62	6.14	7	43	108
231	-114.083	29.3794	1311	16.6	230	80	10.8	3.4	24.6	34.2	87	330	254	4251	3460	17	0	83	9	6.43	7	45	111
232	-114.083	29.3794	1311	16.6	230	80	10.8	3.4	24.6	34.2	87	330	254	4251	3460	17	0	83	9	6.43	7	45	111
233	-114.079	29.3805	1304	16.6	230	80	10.8	3.4	24.7	34.2	87	330	255	4260	3469	17	0	81	9	6.43	7	45	111
234	-114.082	29.3857	1320	16.6	230	80	10.7	3.3	24.6	34.2	86	329	253	4242	3453	17	0	85	9	6.43	7	45	111
235	-114.082	29.3857	1320	16.6	230	80	10.7	3.3	24.6	34.2	86	329	253	4242	3453	17	0	85	9	6.43	7	45	111
236	-114.082	29.3814	1277	16.7	224	77	10.9	3.5	24.7	34.3	88	331	255	4287	3485	17	0	77	8.62	6.14	7	43	108
237	-114.085	29.3809	1327	16.5	231	80	10.7	3.3	24.6	34.2	86	329	253	4233	3444	17	0	86	9	6.43	7	45	111
238	-114.085	29.3809	1327	16.5	231	80	10.7	3.3	24.6	34.2	86	329	253	4233	3444	17	0	86	9	6.43	7	45	111
239	-114.085	29.3809	1327	16.5	231	80	10.7	3.3	24.6	34.2	86	329	253	4233	3444	17	0	86	9	6.43	7	45	111
240	-114.084	29.3843	1241	16.8	218	74	11	3.6	24.8	34.4	83	331	255	4328	3551	17	0	72	8.25	5.86	7	41	106
241	-114.081	29.384	1306	16.6	230	80	10.8	3.4	24.7	34.2	87	330	254	4260	3469	17	0	82	9	6.43	7	45	111
242	-114.082	29.3814	1277	16.7	224	77	10.9	3.5	24.7	34.3	88	331	255	4287	3485	17	0	77	8.62	6.14	7	43	108
243	-114.085	29.3809	1327	16.5	231	80	10.7	3.3	24.6	34.2	86	329	253	4233	3444	17	0	86	9	6.43	7	45	111
244	-114.082	29.3814	1277	16.7	224	77	10.9	3.5	24.7	34.3	88	331	255	4287	3485	17	0	77	8.62	6.14	7	43	108
245	-114.084	29.3843	1241	16.8	218	74	11	3.6	24.8	34.4	83	331	255	4328	3551	17	0	72	8.25	5.86	7	41	106
246	-114.114	29.386	1284	16.7	225	77	10.9	3.4	24.7	34.3	87	331	255	4278	3484	17	0	79	8.62	6.14	7	43	109
247	-114.11	29.3872	1349	16.5	234	81	10.7	3.2	24.5	34.1	85	328	253	4209	3427	17	0	90	8	5.62	8	45	113
248	-114.111	29.3891	1340	16.5	234	81	10.7	3.3	24.6	34.1	86	328	253	4219	3430	17	0	87	8	5.62	8	45	113
249	-114.112	29.3891	1319	16.6	229	78	10.8	3.3	24.6	34.2	86	329	253	4242	3450	17	0	85	8.75	6.14	7	43	111
250	-114.111	29.3748	1263	16.7	221	74	10.9	3.5	24.7	34.3	87	331	255	4298	3496	17	0	76	8.25	5.86	7	41	108
251	-114.113	29.3769	1127	17.1	202	66	11.3	4	25.1	34.6	68	335	274	4438	3774	16	0	57	7.25	5	7	35	100
252	-114.113	29.3769	1127	17.1	202	66	11.3	4	25.1	34.6	68	335	274	4438	3774	16	0	57	7.25	5	7	35	100
253	-114.111	29.3798	1312	16.6	228	77	10.8	3.4	24.6	34.2	87	330	254	4242	3451	17	0	83	8.62	6.14	7	43	111
254	-114.115	29.3831	1236	16.8	216	72	11	3.6	24.8	34.4	83	331	255	4328	3548	17	0	72	8	5.57	7	39	107
255	-114.111	29.3836	1289	16.6	226	77	10.8	3.4	24.7	34.3	87	331	255	4271	3481	17	0	81	8.62	6.14	7	43	110
256	-114.113	29.3845	1304	16.6	227	77	10.8	3.4	24.6	34.2	87	330	254	4254	3463	17	0	82	8.62	6.14	7	43	111
257	-114.114	29.386	1284	16.7	225	77	10.9	3.4	24.7	34.3	87	331	255	4278	3484	17	0	79	8.62	6.14	7	43	109
258	-114.114	29.386	1284	16.7	225	77	10.9	3.4	24.7	34.3	87	331	255	4278	3484	17	0	79	8.62	6.14	7	43	109
259	-114.11	29.3872	1349	16.5	234	81	10.7	3.2	24.5	34.1	85	328	253	4209	3427	17	0	90	8	5.62	8	45	113
260	-114.104	29.3835	1352	16.4	235	81	10.7	3.2	24.5	34.1	86	328	253	4200	3411	17	0	90	8	5.62	8	45	114
261	-114.104	29.3835	1352	16.4	235	81	10.7	3.2	24.5	34.1	86	328	253	4200	3411	17	0	90	8	5.62	8	45	114
262	-114.107	29.3838	1347	16.5	234	81	10.7	3.2	24.5	34.1	85	328	253	4209	3427	17	0	90	8	5.62	8	45	113
263	-114.107	29.3838	1347	16.5	234	81	10.7	3.2	24.5	34.1	85	328	253	4209	3427	17	0	90	8	5.62	8	45	113
264	-114.107	29.3864	1314	16.6	228	78	10.8	3.3	24.6	34.2	87	330	255	4245	3454	17	0	84	8.75	6.14	7	43	111
265	-114.107	29.3864	1314	16.6	228	78	10.8	3.3	24.6	34.2	87	330	255	4245	3454	17	0	84	8.75	6.14	7	43	111
266	-114.108	29.388	1340	16.5	234	81	10.7	3.3	24.6	34.1	86	328	253	4219	3430	17	0	87	8	5.62	8	45	113
267	-114.108	29.388	1340	16.5	234	81	10.7	3.3	24.6	34.1	86	328	253	4219	3430	17	0	87	8	5.62	8	45	113
268	-114.111	29.3891	1340	16.5	234	81	10.7	3.3	24.6	34.1	86	328	253	4219	3430	17	0	87	8	5.62	8	45	113
269	-114.112	29.3891	1319	16.6	229	78	10.8	3.3	24.6	34.2	86	329	253	4242	3450	17	0	85	8.75	6.14	7	43	111
270	-114.111	29.3891	1340	16.5	234	81	10.7	3.3	24.6	34.1	86	328	253	4219	3430	17	0	87	8	5.62	8	45	113
271	-114.112	29.3891	1319	16.6	229	78	10.8	3.3	24.6	34.2	86	329	253	4242	3450	17	0	85	8.75	6.14	7	43	111
272	-114.113	29.3914	1340	16.5	234	81	10.7	3.3	24.6	34.1	86	328	253	4219	3430	17	0	87	8	5.62	8	45	113
273	-114.114	29.3891	1336	16.5	233	81	10.7	3.3	24.6	34.1	86	328	252	4224	3435	17	0	87	8	5.62	8	45	112
274	-114.114	29.386	1284	16.7	225	77	10.9	3.4	24.7	34.3	87	331	255	4278	3484	17	0	79	8.62	6.14	7	43	109
275	-114.111	29.3836	1289	16.6	226	77	10.8	3.4	24.7	34.3	87	331	255	4271	3481	17	0	81	8.62	6.14	7	43	110
276	-114.086	29.3732	1522	15.9	267	97	10.2	2.7	23.9	33.5	95	327	248	3998	3201	19	0	123	7.82	6.11	9	55	126
277	-114.091	29.3743	1479	16	258	93	10.3	2.8	24.1	33.7	85	331	260	4054	3345	19	0	114	8.3	6.62	8	53	122
278	-114.095	29.379	1495	16	262	96	10.2	2.8	24	33.6	85	327	250	4028	3296	19	0	117	7.73	6	9	54	123
279	-114.089	29.3773	1554	15.8	271	100	10.1	2.6	23.8	33.4	101	325	241	3959	3109	19	0	129	8.09	6.33	9	57	127
280	-114.09	29.3787	1484	16	259	94	10.3	2.8	24.1	33.7	82	331	261	4043	3357	19	0	114	7.55	5.89	9	53	122
281	-114.089	29.3842	1379	16.4	238	84	10.6	3.1	24.4	34	85	329	254	4173	3412	18	0	96	8.33	5.88	8	47	114
282	-114.109	29.3932	1381	16.4	240	84	10.6	3.1	24.4	34	85	329	254	4174	3412	18	0	97	8.33	5.88	8	47	115
283	-114.102	29.3902	1286	16.7	224	77	10.8	3.4	24.7	34.3	87	331	255	4278	3487	17	0	81	8.62	6.14	7	43	108
284	-114.102	29.3902	1286	16.7	224	77	10.8	3.4	24.7	34.3	87	331	255	4278	3487	17	0	81	8.62	6.14	7	43	108
285	-114.104	29.3941	1270	16.7	222	75	10.9	3.5	24.8	34.3	87	331	255	4299	3502	17	0	76	8.38	5.86	7	41	108
286	-114.104	29.3941	1270	16.7	222	75	10.9	3.5	24.8	34.3	87	331	255	4299	3502	17	0	76	8.38	5.86	7	41	108
287	-114.108	29.388	1340	16.5	234	81	10.7	3.3	24.6	34.1	86	328	253	4219	3430	17	0	87	8	5.62	8	45	113
288	-114.108	29.388	1340	16.5	234	81	10.7	3.3	24.6	34.1	86	328	253	4219	3430	17	0	87	8	5.62	8	45	113
289	-114.108	29.3895	1330	16.5	233	81	10.7	3.3	24.6	34.2	86	329	253	4227	3443	17	0	86	8	5.62	8	45	112
290	-114.108	29.3895	1330	16.5	233	81	10.7	3.3	24.6	34.2	86	329	253	4227	3443	17	0	86	8	5.62	8	45	112
291	-114.109	29.391	1309	16.6	227	77	10.8	3.4	24.6	34.2	87	330	254	4251	3460	17	0	83	8.62	6.14	7	43	111
292	-114.113	29.3914	1340	16.5	234	81	10.7	3.3	24.6	34.1	86	328	253	4219	3430	17	0	87	8	5.62	8	45	113
293	-114.114	29.3934	1406	16.3	244	86	10.5	3	24.4	33.9	86	331	258	4141	3400	18	0	101	8.56	6.12	8	49	117
294	-114.116	29.3883	1361	16.4	235	81	10.6	3.2	24.5	34.1	86	328	254	4192	3411	18	0	91	8	5.62	8	45	114
295	-114.107	29.3838	1347	16.5	234	81	10.7	3.2	24.5	34.1	85	328	253	4209	3427	17	0	90	8	5.62	8	45	113
296	-114.104	29.3835	1352	16.4	235	81	10.7	3.2	24.5	34.1	86	328	253	4200	3411	17	0	90	8	5.62	8	45	114
297	-114.101	29.3877	1352	16.5	234	81	10.7	3.2	24.5	34.1	85	328	253	4206	3425	17	0	90	8	5.62	8	45	113
298	-114.101	29.3877	1352	16.5	234	81	10.7	3.2	24.5	34.1	85	328	253	4206	3425	17	0	90	8	5.62	8	45	113
299	-114.096	29.3856	1519	15.9	267	97	10.2	2.7	24	33.5	94	327	248	4001	3213	19	0	122	7.82	6.11	9	55	126
300	-114.101	29.385	1399	16.3	244	86	10.5	3.1	24.4	34	85	330	256	4144	3402	18	0	98	8.56	6.12	8	49	117
301	-114.101	29.385	1399	16.3	244	86	10.5	3.1	24.4	34	85	330	256	4144	3402	18	0	98	8.56	6.12	8	49	117
302	-114.106	29.3861	1303	16.6	227	77	10.8	3.4	24.7	34.2	87	330	255	4260	3469	17	0	81	8.62	6.14	7	43	111
303	-114.104	29.3871	1343	16.5	234	81	10.7	3.2	24.5	34.1	86	328	253	4212	3423	17	0	89	8	5.62	8	45	113
304	-114.096	29.3856	1519	15.9	267	97	10.2	2.7	24	33.5	94	327	248	4001	3213	19	0	122	7.82	6.11	9	55	126
305	-114.096	29.389	1378	16.4	238	84	10.6	3.1	24.5	34	85	329	254	4180	3418	18	0	96	8.33	5.88	8	47	114
306	-114.096	29.389	1378	16.4	238	84	10.6	3.1	24.5	34	85	329	254	4180	3418	18	0	96	8.33	5.88	8	47	114
307	-114.099	29.3913	1310	16.6	228	78	10.8	3.4	24.7	34.2	87	330	254	4254	3463	17	0	83	8.75	6.14	7	43	111
308	-114.12	29.3933	1283	16.7	223	75	10.9	3.4	24.7	34.3	87	331	255	4284	3490	17	0	80	8.38	5.86	7	41	109
309	-114.115	29.3975	1425	16.2	247	87	10.4	3	24.3	33.9	86	331	260	4117	3385	18	0	103	8.67	6.12	8	49	119
310	-114.11	29.3962	1350	16.5	234	81	10.7	3.2	24.5	34.1	85	328	253	4212	3431	17	0	90	8	5.62	8	45	113
311	-114.109	29.3958	1302	16.6	227	77	10.8	3.4	24.7	34.3	87	331	255	4260	3477	17	0	81	8.62	6.14	7	43	111
312	-114.109	29.3932	1381	16.4	240	84	10.6	3.1	24.4	34	85	329	254	4174	3412	18	0	97	8.33	5.88	8	47	115
313	-114.109	29.391	1309	16.6	227	77	10.8	3.4	24.6	34.2	87	330	254	4251	3460	17	0	83	8.62	6.14	7	43	111
314	-114.111	29.3909	1333	16.5	233	81	10.7	3.3	24.6	34.2	86	328	253	4224	3435	17	0	86	8	5.62	8	45	112
315	-114.107	29.3864	1314	16.6	228	78	10.8	3.3	24.6	34.2	87	330	255	4245	3454	17	0	84	8.75	6.14	7	43	111
316	-114.104	29.3871	1343	16.5	234	81	10.7	3.2	24.5	34.1	86	328	253	4212	3423	17	0	89	8	5.62	8	45	113
317	-114.102	29.3902	1286	16.7	224	77	10.8	3.4	24.7	34.3	87	331	255	4278	3487	17	0	81	8.62	6.14	7	43	108
318	-114.104	29.3941	1270	16.7	222	75	10.9	3.5	24.8	34.3	87	331	255	4299	3502	17	0	76	8.38	5.86	7	41	108
319	-114.107	29.394	1315	16.6	228	78	10.8	3.3	24.6	34.2	86	329	253	4248	3456	17	0	85	8.75	6.14	7	43	111
320	-114.106	29.394	1320	16.6	231	80	10.7	3.3	24.6	34.2	86	329	253	4239	3450	17	0	85	9	6.43	7	45	111
